# Supplementary material for: Lower mortality after early supervised pulmonary rehabilitation following COPD-exacerbations: a systematic review and meta-analysis
Source: PubMed Central journal article supplement (PMC6139159; doi:10.1186/s12890-018-0718-1), 2018-09-15
Supplement: 12890_2018_718_MOESM1_ESM.pdf [file 12890_2018_718_MOESM1_ESM.pdf]

## Additional file 1: Search strategy

### Overview of searched databases in the first search in 2013:

| Database                                           | Interface | Date:       |
|----------------------------------------------------|-----------|-------------|
| G-I-N International                                |           | 11.07.2013  |
| NICE (UK)                                          |           | 11.07.2013  |
| National Guideline Clearinghouse (USA)             |           | 09.07.2013  |
| Scottish Intercollegiate Guidelines Network (SIGN) |           | 09.07.2013  |
| HTA Database                                       |           | 09.07.2013  |
| The Cochrane Library                               |           | 09. 07 2013 |
| SBU, Sweden                                        |           | 09.07.2013  |
| Socialstyrelsen, Sweden                            |           | 11.07.2013  |
| Helsedirektoratet, Norway                          |           | 10.07.2013  |
| Kunnskapscentret, Norway                           |           | 10. 07.2013 |
| Pedro                                              |           | 12.07.2013  |
| OT-Seeker                                          |           | 10. 07.2013 |

| Database | Interface | Date:      |
|----------|-----------|------------|
| Medline  | Ovid      | 16.07.2013 |
| EMBASE   | Ovid      | 17.07.2013 |
| CINAHL   | Ebsco     | 16.07.2013 |
| PSYCINFO | OVID      | 15.07.2013 |

## Search strategy in 2013

### G-I-N international, 35 records

<http://www.g-i-n.net>

#### Search strategy

chronic obstruct\* OR copd OR coad, 35 records

chronic pulm\*, no new findings

chronic lung, no new findings

chronic airway\* no new findings

### NICE: 53 records

<http://www.nice.org.uk>

#### Search strategy

COPD + guidance, 20 records

COAD + guidance, 1 record, no new findings

obstructive + guidance + respiratory (Condition and diseases), 26 records, 16 new records

chronic obstructive + guidance + respiratory, 18 records , 1 new records

chronic obstructive + guidance, 35 records, 13 new records

chronic obstructive pulmonale + guidance, 2 records, no new findings

chronic obstructive lung + guidance, 26 records, no new findings

chronic obstructive airway + guidance, 18 records, 3 new records

### National Guideline Clearing house: 151 records

<http://www.guideline.gov>

#### Search strategy:

'chronic obstructive pulmonary or copd or coad or chronic obstructive lung or chronic obstructive airway'

### Scottish Intercollegiate Guidelines Network (SIGN): 8 records

**Search strategy:** Respiratory Medicine

### The HTA-database: 74 records

<http://www.crd.york.ac.uk/CRDWeb/>

#### Search strategy:

| Line | Search                                                                   | Hits |        |
|------|--------------------------------------------------------------------------|------|--------|
| 1    | MeSH DESCRIPTOR Pulmonary Disease, Chronic Obstructive EXPLODE ALL TREES | 376  | Delete |

|   |                                                           |      |        |
|---|-----------------------------------------------------------|------|--------|
| 2 | * IN HTA FROM 2002 TO 2013                                | 9073 | Delete |
| 3 | #1 AND #2                                                 | 51   | Delete |
| 4 | (copd) OR (coad) IN HTA FROM 2002 TO 2013                 | 46   | Delete |
| 5 | (lung) OR (pulmon*) OR (airway*) IN HTA FROM 2002 TO 2013 | 450  | Delete |
| 6 | (chronic) AND (obstruct*) IN HTA FROM 2002 TO 2013        | 80   | Delete |
| 7 | #5 AND #6                                                 | 71   | Delete |
| 8 | #3 OR #4 OR #7                                            | 74   | Delete |

#### **SBU, Sweden, 4 records**

<http://www.sbu.se/sv/>

##### **Search strategy:**

*kol*, 4 records, but only 2 relevant records

*kroniskt obstruktiv lungsjukdom* 4 records 3 duplicates, 1 new record.

*kronisk lunge*, no new findings

*kronisk obstruktiv*, no new findings

*lunge*, 20 records, 1 new record

*Luftvägssjukdom*, 1 record, but not relevant

#### **Socialstyrelsen, Sweden, 16 records**

<http://www.socialstyrelsen.se>

##### **Search strategy:**

*kroniskt obstruktiv lungsjukdom + publikationer*, 5, records

*kroniskt obstruktiv lungsjukdom + Föreskrifter och allmänna råd*, 1 record

*KOL + publikationer*, 6 records

*KOL + Nyheter og konferencer*, 4 records

#### **Helsedirektoratet, Norway, 3 records**

<http://helsedirektoratet.no>

##### **Search strategy:**

*KOLS + Publikasjoner*, 1 record

*Lungesykdommer*, 2 records

#### **Kunnskapscenteret, Norway, 23 records**

<http://www.kunnskapscenteret.no>

**Search strategy:**

*KOLS + Publikasjoner*, 20 records

*KOLS + Prosjekter*, 0 records

*KOLS + Rehabilitering*, 0 records

*Lungesykdom + Rehabilitering*, 0 records

*KOLS + kvalitetsforbedring*, 1 record, but no new

*Lungesykdom + kvalitetsforbedring*, 0 records

*kronisk obstruktiv lungesykdom + Publikasjoner*, 10 records, 3 new records

*kronisk obstruktiv lungesykdom + Prosjekter*, 0 records

*lungesykdom + prosjekter*, 0 records

**Pedro, 174 records**

<http://www.pedro.org.au>

**Search strategy:**

Topic: chronic respiratory disease + Practice guideline, 30 records

Topic: chronic respiratory disease + Systematic review, 144 records

**OT-Seeker, 35 records fund**

<http://www.otseeker.com>

**Search strategy:**

copd OR coad OR chronic obstructive\* + Systematic Review 35 records

obstruct\* AND lung + systematic review, 7 records, no new findings

obstruct\* AND pulmon\* + systematic review, 33 records, no new findings

obstruct\* AND airway\* + systematic review, 8 records, 1 new record, but not relevant.

**The Cochrane Library: 275 records fund (80 reviews and 195 other reviews)**

<http://www.thecochranelibrary.com/>

**Search strategy:**

#1 MeSH descriptor: [Pulmonary Disease, Chronic Obstructive] explode all trees

#2 pulmonary:ti,ab,kw (Word variations have been searched)

#3 lung:ti,ab,kw (Word variations have been searched)

#4 airway:ti,ab,kw (Word variations have been searched)

#5 #2 or #3 or #4

#6 chronic obstructive:ti,ab,kw (Word variations have been searched)

#7 #5 and #6

#8 #1 or #7

### **Medline (OVID), 275 records fund**

Database: Ovid MEDLINE(R) In-Process & Other Non-Indexed Citations and Ovid MEDLINE(R)  
<1946 to Present>

#### **Search Strategy:**

---

- 1 exp Pulmonary Disease, Chronic Obstructive/ or (copd or coad).mp. (33486)
- 2 (obstruct\* and (pulmon\* or lung or airway\* or airflow\*)).mp. (98524)
- 3 1 and 2 (31238)
- 4 1 or 3 (33486)
- 5 exp guideline/ or guideline\*.ti. (62221)
- 6 4 and 5 (442)
- 7 limit 6 to ((danish or english or norwegian or swedish) and yr="2002 – Current") (275)

### **EMBASE (OVID), 1174 records fund**

Database: Embase <1974 to 2013 Week 28>

#### **Search Strategy:**

---

- 1 exp \*chronic obstructive lung disease/ (40865)
- 2 practice guideline/ or guideline\*.mp. (376951)
- 3 1 and 2 (2329)
- 4 limit 3 to ((danish or english or norwegian or swedish) and yr="2002 -Current") (1602)
- 5 exp chronic obstructive lung disease/ or (copd or coad).mp. (74316)
- 6 (obstruct\* and (pulmon\* or lung or airway\* or airflow\*)).mp. (143296)
- 7 5 or 6 (148101)
- 8 practice guideline/ or guideline\*.mp. (376951)
- 9 7 and 8 (6031)
- 10 limit 9 to ((danish or english or norwegian or swedish) and yr="2013 -Current") (270)
- 11 4 or 10 (1785)
- 12 exp rehabilitation/ or (rehab\* or occupational therap\*).mp. (320155)
- 13 exp physiotherapy/ or (physical therap\* or physiotherap\*).mp. (71685)
- 14 12 or 13 (370613)
- 15 fitness/ or endurance/ or (physical endurance or physical function).mp. (47768)
- 16 exp exercise/ or exercise test/ or exp walking/ or (walking or shuttle walking test\*).mp. (301013)
- 17 15 or 16 (328028)
- 18 exp smoking cessation/ or smoking.mp. (273075)
- 19 exp nutritional status/ or nutrition/ or exp diet therapy/ or (nutrition\* or diet).mp. (731951)
- 20 body mass/ or (body mass or BMI).mp. (241743)
- 21 19 or 20 (918999)
- 22 patient education/ or social support/ (134596)
- 23 adaptive behavior/ or coping behavior/ or empowerment/ (78274)
- 24 patient participation/ or exp self care/ (60926)

- 25 (psychological adaption or coping or empowerment or Self Management or adherence).mp.  
(166798)
- 26 22 or 23 or 24 or 25 (359619)
- 27 14 or 17 or 18 or 21 or 26 (2016728)
- 28 11 and 27 (959)
- 29 chronic obstructive lung disease/rh, th and (practice guideline/ or guideline\*.mp.) (919)
- 30 28 or 29 (1529)
- 31 limit 30 to ((danish or english or norwegian or swedish) and yr="2002 -Current") (1174)

\*\*\*\*\*

**CINAHL (EBSCO Host), 404 records fund**

**Search strategy:**

| <b>Search ID#</b> | <b>Search Terms</b>        | <b>Search Options</b>                                                                                                             | <b>Last Run Via</b>                                                                          | <b>Results</b> |
|-------------------|----------------------------|-----------------------------------------------------------------------------------------------------------------------------------|----------------------------------------------------------------------------------------------|----------------|
| S11               | S6 AND S9                  | Limiters - Published Date from: 20020101-20131231; Language: Danish, English, Norwegian, Swedish<br>Search modes - Boolean/Phrase | Interface - EBSCOhost<br>Search Screen - Advanced Search<br>Database - CINAHL with Full Text | 404            |
| S10               | S6 AND S9                  | Search modes - Boolean/Phrase                                                                                                     | Interface - EBSCOhost<br>Search Screen - Advanced Search<br>Database - CINAHL with Full Text | 464            |
| S9                | S7 OR S8                   | Search modes - Boolean/Phrase                                                                                                     | Interface - EBSCOhost<br>Search Screen - Advanced Search<br>Database - CINAHL with Full Text | 39,717         |
| S8                | TI guideline*              | Search modes - Boolean/Phrase                                                                                                     | Interface - EBSCOhost<br>Search Screen - Advanced Search<br>Database - CINAHL with Full Text | 18,324         |
| S7                | (MH "Practice Guidelines") | Search modes - Boolean/Phrase                                                                                                     | Interface - EBSCOhost<br>Search Screen - Advanced Search<br>Database - CINAHL with Full Text | 30,146         |
| S6                | S1 OR S2 OR S5             | Search modes - Boolean/Phrase                                                                                                     | Interface - EBSCOhost<br>Search Screen - Advanced Search<br>Database - CINAHL with Full Text | 16,134         |
| S5                | S3 AND S4                  | Search modes - Boolean/Phrase                                                                                                     | Interface - EBSCOhost<br>Search Screen -                                                     | 15,714         |

|    |                                                |                               |                                                                                        |        |
|----|------------------------------------------------|-------------------------------|----------------------------------------------------------------------------------------|--------|
|    |                                                |                               | Advanced Search Database - CINAHL with Full Text                                       |        |
| S4 | obstruct*                                      | Search modes - Boolean/Phrase | Interface - EBSCOhost Search Screen - Advanced Search Database - CINAHL with Full Text | 23,334 |
| S3 | pulmon* OR lung OR airway* OR airflow*         | Search modes - Boolean/Phrase | Interface - EBSCOhost Search Screen - Advanced Search Database - CINAHL with Full Text | 75,205 |
| S2 | copd OR coad                                   | Search modes - Boolean/Phrase | Interface - EBSCOhost Search Screen - Advanced Search Database - CINAHL with Full Text | 5,355  |
| S1 | (MH "Pulmonary Disease, Chronic Obstructive+") | Search modes - Boolean/Phrase | Interface - EBSCOhost Search Screen - Advanced Search Database - CINAHL with Full Text | 6,618  |

### PsycINFO, 55 records fund

Database: PsycINFO <1806 to July Week 2 2013>

### Search Strategy:

- 
- 1 exp Chronic Obstructive Pulmonary Disease/ (681)
  - 2 (copd or coad).mp. (849)
  - 3 (obstruct\* and (pulmon\* or lung or airway\*)).mp. (2177)
  - 4 1 or 2 or 3 (2399)
  - 5 treatment guidelines/ (3872)
  - 6 guideline\*.mp. (40056)
  - 7 5 or 6 (40056)
  - 8 4 and 7 (61)
  - 9 limit 8 to ((danish or english or norwegian or swedish) and yr="2002 – Current") (55)

\*\*\*\*\*

## Second search in 2013:

### Systematic Reviews, Meta-analysis and guidelines

Medline og Embase, 134 records fund, after duplicate search: 108 records.

Search conducted: 11.11.2013

### Medline, 46 records fund.

Database: Ovid MEDLINE(R) In-Process & Other Non-Indexed Citations and Ovid MEDLINE(R) <1946 to Present>

### Search Strategy:

- 
- 1 exp Pulmonary Disease, Chronic Obstructive/ or (copd or coad).mp. (35070)
  - 2 Weight Lifting/ (4003)
  - 3 exp Resistance Training/ (3134)
  - 4 motion therapy, continuous passive/ or muscle stretching exercises/ (1465)
  - 5 static exercise.ti,ab. (423)
  - 6 muscle training.ti,ab. (1484)
  - 7 isometric exercise\*.ti,ab. (1611)
  - 8 isokinetic exercise\*.ti,ab. (234)
  - 9 (anaerobic exercise\* or aerobic exercise\*).ti,ab. (5505)
  - 10 Strength training.ti,ab. (2930)
  - 11 workout\*.ti,ab. (656)
  - 12 body building.ti,ab. (170)
  - 13 exp Muscle Strength/ (17870)
  - 14 2 or 3 or 4 or 5 or 6 or 7 or 8 or 9 or 10 or 11 or 12 or 13 (34948)
  - 15 1 and 14 (468)
  - 16 meta-analysis/ (51581)
  - 17 exp guideline/ (25320)
  - 18 (systematic review or meta analysis).ti,ab. (86887)
  - 19 exp Evidence-Based Medicine/ (55611)
  - 20 16 or 17 or 18 or 19 (177722)
  - 21 15 and 20 (41)
  - 22 limit 15 to (guideline or meta analysis or practice guideline or systematic reviews) (44)
  - 23 21 or 22 (46)

\*\*\*\*\*

## Embase, 88 records fund

Database: Embase <1980 to 2013 Week 45>

### Search Strategy:

- 
- 1 exp Pulmonary Disease, Chronic Obstructive/ or (copd or coad).mp. (75361)
  - 2 exp resistance training/ (4683)
  - 3 exp weight lifting/ (3744)
  - 4 arm exercise/ or isokinetic exercise/ or isometric exercise/ or muscle training/ or static exercise/ (10072)
  - 5 workout\*.ti,ab. (845)
  - 6 (anaerobic exercise\* or aerobic exercise\*).ti,ab. (6705)
  - 7 Strength training.ti,ab. (3313)
  - 8 body building.ti,ab. (280)
  - 9 muscle training.ti,ab. (1828)
  - 10 muscle stretching.ti,ab. (277)
  - 11 exp muscle strength/ (30912)
  - 12 2 or 3 or 4 or 5 or 6 or 7 or 8 or 9 or 10 or 11 (52574)
  - 13 1 and 12 (1266)
  - 14 evidence based medicine/ or consensus development/ or meta analysis/ or "meta analysis (topic)"/ or outcomes research/ or "systematic review"/ or "systematic review (topic)"/ (271326)
  - 15 13 and 14 (103)
  - 16 limit 13 to (evidence based medicine or concensus development or meta analysis or outcomes research or "systematic review") (96)
  - 17 15 or 16 (103)
  - 18 limit 17 to ((danish or english or norwegian or swedish) and yr="2002 -Current") (87)
  - 19 (systematic review or meta analysis).ti. (63018)
  - 20 14 or 19 (284674)
  - 21 13 and 20 (106)
  - 22 16 or 21 (106)
  - 23 limit 22 to ((danish or english or norwegian or swedish) and yr="2002 -Current") (88)

\*\*\*\*\*

## Randomized Controlled Trials in 2013

Search in MEDLINE and EMBASE . Search conducted: 27.11.2013. We found 1254 records, after duplicate search we found 750 records.

**Medline, 649 records found.**

Database: Ovid MEDLINE(R) In-Process & Other Non-Indexed Citations and Ovid MEDLINE(R) <1946 to Present>

### Search Strategy:

- 
- 1 Weight Lifting/ (4008)
  - 2 exp Resistance Training/ (3160)
  - 3 motion therapy, continuous passive/ or muscle stretching exercises/ (1472)
  - 4 static exercise.ti,ab. (424)
  - 5 muscle training.ti,ab. (1488)
  - 6 isometric exercise\*.ti,ab. (1613)
  - 7 isokinetic exercise\*.ti,ab. (235)
  - 8 (anaerobic exercise\* or aerobic exercise\*).ti,ab. (5532)
  - 9 Strength training.ti,ab. (2947)
  - 10 workout\*.ti,ab. (663)
  - 11 body building.ti,ab. (170)
  - 12 exp Muscle Strength/ (17961)
  - 13 exp Exercise Movement Techniques/ (5321)
  - 14 exp \*Exercise Test/ (14746)
  - 15 Exercise Tolerance/ (8505)
  - 16 \*Physical Endurance/ (8937)
  - 17 (exercise adj (testing or tolerance or capacity)).ti,ab. (20868)
  - 18 ((stress or treadmill or step) adj testing).ti,ab. (4933)
  - 19 (shuttle adj2 walk\*).ti,ab. (389)
  - 20 1 or 2 or 3 or 4 or 5 or 6 or 7 or 8 or 9 or 10 or 11 or 12 or 13 or 14 or 15 or 16 or 17 or 18 or 19 (83767)
  - 21 exp Pulmonary Disease, Chronic Obstructive/ (24710)
  - 22 (chronic obstructive pulmonary disease or coad or copd).ti,ab. (38238)
  - 23 (chronic obstructive lung disease or lung disease chronic obstructive).ti,ab. (3034)
  - 24 21 or 22 or 23 (44777)
  - 25 20 and 24 (3311)
  - 26 randomized controlled trial/ or ((randomized or randomised) adj2 trial).ti,ab. or rct.ti,ab. (425466)
  - 27 25 and 26 (687)
  - 28 limit 27 to (danish or english or norwegian or swedish) (649)

## Embase , 605 records found

Database: Embase <1974 to 2013 November 26>

### Search Strategy:

---

- 1 exp resistance training/ (4781)
- 2 exp weight lifting/ (3821)
- 3 arm exercise/ or isokinetic exercise/ or isometric exercise/ or muscle training/ or static exercise/ (10353)
- 4 workout\*.ti,ab. (855)
- 5 (anaerobic exercise\* or aerobic exercise\*).ti,ab. (6756)
- 6 Strength training.ti,ab. (3357)
- 7 body building.ti,ab. (286)
- 8 muscle training.ti,ab. (1864)
- 9 muscle stretching.ti,ab. (289)
- 10 muscle training/ (4714)
- 11 exp \*kinesiotherapy/ (22914)
- 12 exp \*exercise/ or exp muscle exercise/ (104828)
- 13 (exercise adj (testing or tolerance or capacity)).ti,ab. (26741)
- 14 ((stress or treadmill or step) adj testing).ti,ab. (6442)
- 15 (shuttle adj2 walk\*).ti,ab. (536)
- 16 exercise tolerance/ (10823)
- 17 1 or 2 or 3 or 4 or 5 or 6 or 7 or 8 or 9 or 10 or 11 or 12 or 13 or 14 or 15 or 16 (162372)
- 18 exp chronic obstructive lung disease/ (70846)
- 19 (chronic obstructive pulmonary disease or coad or copd).ti,ab. (49748)
- 20 (chronic obstructive lung disease or lung disease chronic obstructive).ti,ab. (4080)
- 21 18 or 19 or 20 (81194)
- 22 17 and 21 (5021)
- 23 randomized controlled trial/ or ((randomized or randomised) adj2 trial).ti,ab. or rct.ti,ab. (414459)
- 24 22 and 23 (655)
- 25 limit 24 to (danish or english or norwegian or swedish) (605)

## PEDRO, 89 records found

We found 89 records, after duplicate search: 18 new records.

Search conducted: 11.12.2013

### Search strategy:

Therapy: strength training AND topic: chronic respiratory disease AND Method: clinical trial

From year 2002 -

## Search strategy in 2017

### Overview of searched databases in the first search for guidelines and systematic reviews in 2017:

| Database                                           | Interface | Fund   | Date       |
|----------------------------------------------------|-----------|--------|------------|
| G-I-N International                                | Internet  | (49) 9 | 26.06.2017 |
| NICE (UK)                                          | -         | (54) 4 | 26.06.2017 |
| National Guideline Clearinghouse (USA)             | -         | (27) 8 | 26.06.2017 |
| Scottish Intercollegiate Guidelines Network (SIGN) | -         | None   | 26.06.2017 |
| HTA Databasen (CRD database)                       | -         | 31     | 26.06.2017 |
| SBU, Sweden                                        | -         | 4      | 26.06.2017 |
| Socialstyrelsen, Sweden                            | -         | 4      | 26.06.2017 |
| Helsedirektoratet, Norway                          | -         | None   | 26.06.2017 |
| Kunnskapssenteret, Norway                          | -         | None   | 26.06.2017 |
| The Cochrane library                               | -         | 70     | 16.09.2017 |
| Medline                                            | OVID      | 218    | 07.09.2017 |
| Embase                                             | OVID      | 256    | 07.09.2017 |

## Search strategy in 2017

### G-I-N international: 49 records, 9 relevant

<http://www.g-i-n.net>

#### Search strategy:

COPD or chronic obstructive pulmonary disease

### NICE: 54 records, 4 relevant

<http://www.nice.org.uk>

#### Search strategy:

COPD or chronic obstructive pulmonary disease

**National Guideline Clearinghouse: 27 records, 8 relevant**

<http://www.guideline.gov>

**Search strategy:**

COPD or chronic obstructive pulmonary disease

**CRD/HTA: 31 records**

<http://www.crd.york.ac.uk/CRDWeb/>

**Search strategy:**

| Line | Search                                                                    | Hits |
|------|---------------------------------------------------------------------------|------|
| 1    | (COPD OR chronic obstructive pulmonary disease*) IN HTA FROM 2013 TO 2017 | 31   |

**SBU, Sweden: 4 records**

<http://www.sbu.se/sv/>

**Search strategy:**

kroniskt obstruktiv lungsjukdom

KOL

**Socialstyrelsen, Sweden: 4 records**

<http://www.socialstyrelsen.se>

**Search strategy:**

kroniskt obstruktiv lungsjukdom

KOL

**Medline (OVID): 218 records fund**

Database(s): Ovid MEDLINE(R) Epub Ahead of Print, In-Process & Other Non-Indexed Citations, Ovid MEDLINE(R) Daily, Ovid MEDLINE and Versions(R)

**Search strategy:**

| # | Searches                                                          | Results |
|---|-------------------------------------------------------------------|---------|
| 1 | exp Pulmonary Disease, Chronic Obstructive/                       | 48705   |
| 2 | (chronic obstructive lung adj (disease or disorder*)).ti,kw.      | 1171    |
| 3 | (chronic obstructive pulmonary adj (disease or disorder*)).ti,kw. | 16086   |

|    |                                                                                                  |        |
|----|--------------------------------------------------------------------------------------------------|--------|
| 4  | (chronic obstructive airway* adj (disease or disorder*)).ti,kw.                                  | 249    |
| 5  | (copd or coad or kol).ti,kw.                                                                     | 17351  |
| 6  | or/1-5                                                                                           | 59213  |
| 7  | (Guideline* or practice guideline* or clinical guideline* or guidance or recommendation*).ti,kw. | 114688 |
| 8  | 6 and 7                                                                                          | 636    |
| 9  | limit 6 to (guideline or practice guideline)                                                     | 164    |
| 10 | 8 or 9                                                                                           | 682    |
| 11 | limit 10 to (yr="2013-2017" and (danish or english or french or german or norwegian or swedish)) | 218    |

### Embase (OVID): 256 records fund

Database(s): **Embase** 1974 to 2017 September 06

#### Search strategy:

| # | Searches                                                                                            | Results |
|---|-----------------------------------------------------------------------------------------------------|---------|
| 1 | exp chronic obstructive lung disease/                                                               | 104177  |
| 2 | (chronic obstructive lung adj (disease or disorder*)).ti,kw. and (2015* or 2016* or 2017*).em.      | 1771    |
| 3 | (chronic obstructive pulmonary adj (disease or disorder*)).ti,kw. and (2015* or 2016* or 2017*).em. | 25991   |
| 4 | (chronic obstructive airway* adj (disease or disorder*)).ti,kw. and (2015* or 2016* or 2017*).em.   | 378     |
| 5 | (copd or coad or kol).ti,kw. and (2015* or 2016* or 2017*).em.                                      | 31486   |
| 6 | or/1-5                                                                                              | 111380  |
| 7 | *practice guideline/                                                                                | 53580   |
| 8 | 6 and 7                                                                                             | 619     |
| 9 | limit 8 to (yr="2013-2017" and (danish or english or french or german or norwegian or swedish))     | 256     |

## Cochrane Reviews: 70 records fund

| ID | Search                                                                             | Hits  |
|----|------------------------------------------------------------------------------------|-------|
| #1 | MeSH descriptor: [Pulmonary Disease, Chronic Obstructive] explode all trees        | 3428  |
| #2 | (chronic obstructive lung near (disease or disorder*)):ti,kw                       | 3737  |
| #3 | (chronic obstructive pulmonary near (disease or disorder*)):ti,kw                  | 5853  |
| #4 | (chronic obstructive airway* near/2 (disease or disorder*)):ti,kw                  | 144   |
| #5 | (copd or coad or kol):ti,kw                                                        | 7311  |
| #6 | #1 or #2 or #3 or #4 or #5                                                         | 12656 |
| #7 | #6 Publication Year from 2013 to 2017, in Cochrane Reviews (Reviews and Protocols) | 70    |

## Second search for primary studies (Randomized Controlled Trials) in 2017

### Overview over searched databases in the second search in 2017:

| Database                | Interface | Fund | Date       |
|-------------------------|-----------|------|------------|
| Medline                 | OVID      | 787  | 06.10.2017 |
| Embase                  | OVID      | 1083 | 06.10.2017 |
| Cinahl                  | EbsCo     | 102  | 06.10.2017 |
| Pedro                   | Internet  | 121  | 06.10.2017 |
| After duplicate sorting |           | 1187 |            |

### Medline

Database(s): Ovid MEDLINE(R) Epub Ahead of Print, In-Process & Other Non-Indexed Citations, Ovid MEDLINE(R) Daily, Ovid MEDLINE and Versions(R)

### Search Strategy:

| #  | Searches                                                                                                                                                                                                                                                                                                                                                             | Results |
|----|----------------------------------------------------------------------------------------------------------------------------------------------------------------------------------------------------------------------------------------------------------------------------------------------------------------------------------------------------------------------|---------|
| 1  | exp Pulmonary Disease, Chronic Obstructive/                                                                                                                                                                                                                                                                                                                          | 49983   |
| 2  | (chronic obstructive pulmonary disease or coad or copd).ti,ab,kw.                                                                                                                                                                                                                                                                                                    | 54594   |
| 3  | (chronic obstructive lung disease or lung disease chronic obstructive).ti,ab,kw.                                                                                                                                                                                                                                                                                     | 3925    |
| 4  | or/1-3                                                                                                                                                                                                                                                                                                                                                               | 77102   |
| 5  | exp Rehabilitation/ or exp "Delivery of Health Care, Integrated"/                                                                                                                                                                                                                                                                                                    | 292185  |
| 6  | 4 and 5                                                                                                                                                                                                                                                                                                                                                              | 3156    |
| 7  | ((rehabilitation or integrated or Multi-modal* or multimodal* or multi-component or multicomponent or multidisciplinary or multi-disciplinary or interdisciplinary or inter-disciplinary or complimentary or different or multiple or addition*) adj3 (program* or intervention* or treatment* or therap* or training or exercise* or care or modalities)).ti,ab,kw. | 294224  |
| 8  | 4 and 7                                                                                                                                                                                                                                                                                                                                                              | 2495    |
| 9  | "Pulmonary Disease, Chronic Obstructive"/rh                                                                                                                                                                                                                                                                                                                          | 2023    |
| 10 | (Pulmonary adj1 Rehabilitation).ti,ab,kw.                                                                                                                                                                                                                                                                                                                            | 2901    |

|    |                                                                                                                                          |        |
|----|------------------------------------------------------------------------------------------------------------------------------------------|--------|
| 11 | ((chronic obstructive pulmonary disease or coad or copd or chronic obstructive lung disease) and (rehabilitation or program*)).ti,ab,kw. | 5051   |
| 12 | or/6,8-11                                                                                                                                | 8839   |
| 13 | limit 12 to (randomized controlled trial or controlled clinical trial)                                                                   | 1263   |
| 14 | ((random* or control?ed or crossover or cross-over or blind* or mask*) adj3 (trial*1 or study or studies or analy*)) or rct).ti,ab,kw.   | 598707 |
| 15 | (placebo* or single-blind* or double-blind* or triple-blind*).ti,ab,kw.                                                                  | 272653 |
| 16 | ((single or double or triple) adj2 (blind* or mask*)).ti,ab,kw.                                                                          | 168315 |
| 17 | (patient* adj3 (random* or blind* or mask*)).ti,ab,kw.                                                                                   | 104006 |
| 18 | or/14-17                                                                                                                                 | 729035 |
| 19 | 12 and 18                                                                                                                                | 1505   |
| 20 | 13 or 19                                                                                                                                 | 1905   |
| 21 | limit 20 to (yr="2013-2017" and (english or danish or german or norwegian or swedish))                                                   | 787    |

## Embase

Database(s): Embase 1974 to 2017 October 03

### Search Strategy:

| # | Searches                                                                                                                                                                                                                                                                                                                                                             | Results |
|---|----------------------------------------------------------------------------------------------------------------------------------------------------------------------------------------------------------------------------------------------------------------------------------------------------------------------------------------------------------------------|---------|
| 1 | exp Chronic Obstructive Pulmonary Disease/                                                                                                                                                                                                                                                                                                                           | 104825  |
| 2 | (chronic obstructive pulmonary disease or coad or copd).ti,ab,kw.                                                                                                                                                                                                                                                                                                    | 88899   |
| 3 | (chronic obstructive lung disease or lung disease chronic obstructive).ti,ab,kw.                                                                                                                                                                                                                                                                                     | 5405    |
| 4 | or/1-3                                                                                                                                                                                                                                                                                                                                                               | 127951  |
| 5 | ((rehabilitation or integrated or Multi-modal* or multimodal* or multi-component or multicomponent or multidisciplinary or multi-disciplinary or interdisciplinary or inter-disciplinary or complimentary or different or multiple or addition*) adj3 (program* or intervention* or treatment* or therap* or training or exercise* or care or modalities)).ti,ab,kw. | 345440  |
| 6 | 4 and 5                                                                                                                                                                                                                                                                                                                                                              | 4513    |
| 7 | Chronic Obstructive Pulmonary Disease/rh                                                                                                                                                                                                                                                                                                                             | 950     |
| 8 | (Pulmonary adj1 Rehabilitation).ti,ab,kw.                                                                                                                                                                                                                                                                                                                            | 5212    |

|    |                                                                                                                                        |        |
|----|----------------------------------------------------------------------------------------------------------------------------------------|--------|
| 9  | ((copd or chronic obstructive pulmonary disease) and (rehabilitation or program*)).ti,ab,kw.                                           | 8893   |
| 10 | 6 or 7 or 8 or 9                                                                                                                       | 12569  |
| 11 | limit 10 to (randomized controlled trial or controlled clinical trial)                                                                 | 1297   |
| 12 | ((random* or control?ed or crossover or cross-over or blind* or mask*) adj3 (trial*1 or study or studies or analy*)) or rct).ti,ab,kw. | 748848 |
| 13 | (placebo* or single-blind* or double-blind* or triple-blind*).ti,ab,kw.                                                                | 341609 |
| 14 | ((single or double or triple) adj2 (blind* or mask*)).ti,ab,kw.                                                                        | 207721 |
| 15 | (patient* adj3 (random* or blind* or mask*)).ti,ab,kw.                                                                                 | 143336 |
| 16 | or/12-15                                                                                                                               | 919107 |
| 17 | 10 and 16                                                                                                                              | 1917   |
| 18 | 11 or 17                                                                                                                               | 2268   |
| 19 | limit 18 to (yr="2013-2017" and (english or danish or german or norwegian or swedish))                                                 | 1063   |

## Cinahl

### Search strategy:

| #   | Query                                                                                                                                                                          | Limiters/Expanders                                                                                  | Results |
|-----|--------------------------------------------------------------------------------------------------------------------------------------------------------------------------------|-----------------------------------------------------------------------------------------------------|---------|
| S11 | S9 AND S10                                                                                                                                                                     | Limiters - Published Date: 20130101-20171031; Language: Danish, English, German, Norwegian, Swedish | 102     |
| S10 | PT Randomized Controlled Trial                                                                                                                                                 |                                                                                                     | 31,565  |
| S9  | S6 OR S7 OR S8                                                                                                                                                                 |                                                                                                     | 10,647  |
| S8  | TX ((chronic obstructive pulmonary disease or coad or copd or chronic obstructive lung disease) and (rehabilitation or program*))                                              |                                                                                                     | 10,145  |
| S7  | TI (Pulmonary N1 Rehabilitation)                                                                                                                                               |                                                                                                     | 716     |
| S6  | S4 AND S5                                                                                                                                                                      |                                                                                                     | 994     |
| S5  | TX ((rehabilitation or integrated or Multi-modal* or multimodal* or multi-component or multicomponent or multidisciplinary or multidisciplinary or interdisciplinary or inter- |                                                                                                     | 149,149 |

|    |                                                                                                                                                                              |  |        |
|----|------------------------------------------------------------------------------------------------------------------------------------------------------------------------------|--|--------|
|    | disciplinary or complimentary or different or multiple or addition*) N3 (program* or intervention* or treatment* or therap* or training or exercise* or care or modalities)) |  |        |
| S4 | S1 OR S2 OR S3                                                                                                                                                               |  | 10,515 |
| S3 | TI (chronic obstructive lung disease or lung disease chronic obstructive)                                                                                                    |  | 77     |
| S2 | TI (chronic obstructive pulmonary disease or coad or copd)                                                                                                                   |  | 7,850  |
| S1 | (MH "Pulmonary Disease, Chronic Obstructive+")                                                                                                                               |  | 9,486  |

**PEDRO: 121 records fund**

Abstract & Title: COPD Rehabilitation or COPD Program\*

Method: Clinical trial

Published Since: 2013
