# Supplementary material for: Lower mortality after early supervised pulmonary rehabilitation following COPD-exacerbations: a systematic review and meta-analysis
Source: PubMed Central journal article supplement (PMC6139159; doi:10.1186/s12890-018-0718-1), 2018-09-15
Supplement: 12890_2018_718_MOESM2_ESM.pdf [file 12890_2018_718_MOESM2_ESM.pdf]

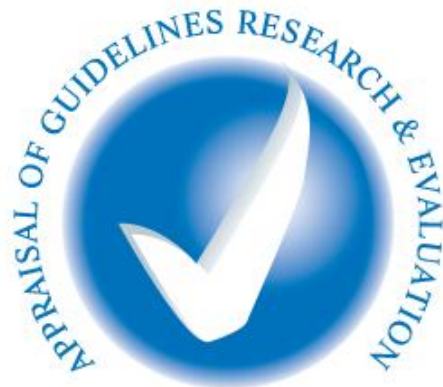

# AGREE II

## **A critical group appraisal of: Pulmonary rehabilitation for patients with chronic pulmonary disease (COPD): an evidence-based analysis using the AGREE II Instrument**

Created with the AGREE II Online Guideline Appraisal Tool.

No endorsement of the content of this document by the AGREE Research Trust should be implied.

Co-ordinator: Ulrik Winning Iepsen

Date: 25 October 2013

Email: [ulrik\\_winning@hotmail.com](mailto:ulrik_winning@hotmail.com)

URL of this appraisal: <http://www.agreetrust.org/group-appraisal/210>

Guideline URL:

[www.hqontario.ca/en/mas/tech/pdfs/2012/rev\\_Pulmonary\\_Rehab\\_March.pdf](http://www.hqontario.ca/en/mas/tech/pdfs/2012/rev_Pulmonary_Rehab_March.pdf)
