# Supplementary material for: Lower mortality after early supervised pulmonary rehabilitation following COPD-exacerbations: a systematic review and meta-analysis
Source: PubMed Central journal article supplement (PMC6139159; doi:10.1186/s12890-018-0718-1), 2018-09-15
Supplement: 12890_2018_718_MOESM3_ESM.pdf [file 12890_2018_718_MOESM3_ESM.pdf]

**Additional file 3.** AMSTAR (A Measurement Tool to Asses Systematic Reviews) assessment of the included systematic reviews.

| Observer  | Citation   | Was meta-analysis performed for the relevant outcomes? | 1. Was an 'a priori' design provided? | 2. Was there duplicate study selection and data extraction? | 3. Was a comprehensive literature search performed? | 4. Was the status of publication (i.e. grey literature) used as an inclusion criterion? | 5. Was a list of studies (included and excluded) provided? | 6. Were the characteristics of the included studies provided? | 7. Was the scientific quality of the included studies assessed and documented? | 8. Was the scientific quality of the included studies used appropriately in formulating conclusions? | 9. Were the methods used to combine the findings of studies appropriately in formulating conclusions? | 10. Was the likelihood of publication bias assessed? | 11. Was the conflict of interest included? | <b>Total score</b> |
|-----------|------------|--------------------------------------------------------|---------------------------------------|-------------------------------------------------------------|-----------------------------------------------------|-----------------------------------------------------------------------------------------|------------------------------------------------------------|---------------------------------------------------------------|--------------------------------------------------------------------------------|------------------------------------------------------------------------------------------------------|-------------------------------------------------------------------------------------------------------|------------------------------------------------------|--------------------------------------------|--------------------|
| Consensus | Puhan 2011 | Yes                                                    | Yes                                   | Yes                                                         | Yes                                                 | Yes                                                                                     | Yes                                                        | Yes                                                           | Yes                                                                            | Yes                                                                                                  | Yes                                                                                                   | No                                                   | Yes                                        | <b>10</b>          |
| Consensus | Puhan 2016 | Yes                                                    | Yes                                   | Yes                                                         | Yes                                                 | Yes                                                                                     | Yes                                                        | Yes                                                           | Yes                                                                            | Yes                                                                                                  | Yes                                                                                                   | No                                                   | Yes                                        | <b>10</b>          |
