# Supplementary material for: Lower mortality after early supervised pulmonary rehabilitation following COPD-exacerbations: a systematic review and meta-analysis
Source: PubMed Central journal article supplement (PMC6139159; doi:10.1186/s12890-018-0718-1), 2018-09-15
Supplement: 12890_2018_718_MOESM4_ESM.pdf [file 12890_2018_718_MOESM4_ESM.pdf]

**Additional file 4. Characteristics of included studies**

**Behnke 2000**

|               |                                                                                                                                                                                                                                                                                                                                                                                                                                                                      |
|---------------|----------------------------------------------------------------------------------------------------------------------------------------------------------------------------------------------------------------------------------------------------------------------------------------------------------------------------------------------------------------------------------------------------------------------------------------------------------------------|
| Methods       | Randomized parallel group trial                                                                                                                                                                                                                                                                                                                                                                                                                                      |
| Participants  | 26 COPD patients (mean age 67 years, 77% males, mean FEV <sub>1</sub> =36% predicted) after inpatient treatment for acute exacerbation                                                                                                                                                                                                                                                                                                                               |
| Interventions | Rehabilitation: Within 4-7 days after admission, inpatient pulmonary rehabilitation with endurance exercise (5 walking sessions/day for 10 days), followed by six months of supervised home-based endurance exercise (3 walking sessions/day for 6 months). Completion rate of pulmonary rehabilitation of 65.2% (15 out of 23 patients)<br>Usual care: Standard inpatient care without exercise and standard community care with respirologist. Follow-up: 76 weeks |
| Outcomes      | Lung function, health-related quality of life (HRQoL), walking test (6MWT), breathlessness, readmissions                                                                                                                                                                                                                                                                                                                                                             |
| Notes         |                                                                                                                                                                                                                                                                                                                                                                                                                                                                      |

Risk of bias table:

| Bias                                                                            | Author's judgement | Support for judgement                                                                                                                                                                                           |
|---------------------------------------------------------------------------------|--------------------|-----------------------------------------------------------------------------------------------------------------------------------------------------------------------------------------------------------------|
| Random sequence generation (selection bias)                                     | Unclear risk       | See Giacomini, M., D. DeJean, and D. Simeonov. "PULMONARY REHABILITATION FOR PATIENTS WITH CHRONIC PULMONARY DISEASE (COPD): AN EVIDENCE BASED ANALYSIS." <i>Ont Health Technol Assess Ser</i> 12 (2012): 1-47. |
| Allocation concealment (selection bias)                                         | Low risk           | See Giacomini, M., D. DeJean, and D. Simeonov. "PULMONARY REHABILITATION FOR PATIENTS WITH CHRONIC PULMONARY DISEASE (COPD): AN EVIDENCE BASED ANALYSIS." <i>Ont Health Technol Assess Ser</i> 12 (2012): 1-47. |
| Blinding of participants and personnel (performance bias)<br>Hospital admission | Unclear risk       | See Giacomini, M., D. DeJean, and D. Simeonov. "PULMONARY REHABILITATION FOR PATIENTS WITH CHRONIC PULMONARY DISEASE (COPD): AN EVIDENCE BASED ANALYSIS." <i>Ont Health Technol Assess Ser</i> 12 (2012): 1-47. |
| Blinding of participants                                                        | High risk          | See Giacomini, M., D. DeJean, and D. Simeonov. "PULMONARY REHABILITATION FOR                                                                                                                                    |

|                                                                              |              |                                                                                                                                                                                                                 |
|------------------------------------------------------------------------------|--------------|-----------------------------------------------------------------------------------------------------------------------------------------------------------------------------------------------------------------|
| and personnel<br>(performance bias)<br>HRQoL                                 |              | PATIENTS WITH CHRONIC PULMONARY DISEASE (COPD): AN EVIDENCE BASED ANALYSIS." <i>Ont Health Technol Assess Ser 12</i> (2012): 1-47.                                                                              |
| Blinding of participants<br>and personnel<br>(performance bias)<br>Mortality | Low risk     | See Giacomini, M., D. DeJean, and D. Simeonov. "PULMONARY REHABILITATION FOR PATIENTS WITH CHRONIC PULMONARY DISEASE (COPD): AN EVIDENCE BASED ANALYSIS." <i>Ont Health Technol Assess Ser 12</i> (2012): 1-47. |
| Blinding of participants<br>and personnel<br>(performance bias)<br>Walk test | Unclear risk | See Giacomini, M., D. DeJean, and D. Simeonov. "PULMONARY REHABILITATION FOR PATIENTS WITH CHRONIC PULMONARY DISEASE (COPD): AN EVIDENCE BASED ANALYSIS." <i>Ont Health Technol Assess Ser 12</i> (2012): 1-47. |
| Blinding of outcome<br>assessment<br>(detection bias)                        | Low risk     | See Giacomini, M., D. DeJean, and D. Simeonov. "PULMONARY REHABILITATION FOR PATIENTS WITH CHRONIC PULMONARY DISEASE (COPD): AN EVIDENCE BASED ANALYSIS." <i>Ont Health Technol Assess Ser 12</i> (2012): 1-47. |
| Incomplete outcome data<br>(attrition<br>bias)                               | High risk    | See Giacomini, M., D. DeJean, and D. Simeonov. "PULMONARY REHABILITATION FOR PATIENTS WITH CHRONIC PULMONARY DISEASE (COPD): AN EVIDENCE BASED ANALYSIS." <i>Ont Health Technol Assess Ser 12</i> (2012): 1-47. |
| Selective reporting<br>(reporting bias)                                      | Unclear risk | See Giacomini, M., D. DeJean, and D. Simeonov. "PULMONARY REHABILITATION FOR PATIENTS WITH CHRONIC PULMONARY DISEASE (COPD): AN EVIDENCE BASED ANALYSIS." <i>Ont Health Technol Assess Ser 12</i> (2012): 1-47. |
| Other bias                                                                   | Unclear risk | See Giacomini, M., D. DeJean, and D. Simeonov. "PULMONARY REHABILITATION FOR PATIENTS WITH CHRONIC PULMONARY DISEASE (COPD): AN EVIDENCE BASED ANALYSIS." <i>Ont Health Technol Assess Ser 12</i> (2012): 1-47. |

### Daabis 2017

|              |                                                                                                                                                                                                                 |
|--------------|-----------------------------------------------------------------------------------------------------------------------------------------------------------------------------------------------------------------|
| Methods      | Study design: Randomized controlled trial<br>Study grouping: Parallel group                                                                                                                                     |
| Participants | Baseline Characteristics<br>Intervention 1 <ul style="list-style-type: none"> <li>• COPD severity (GOLD/MRC score): 2.62 (0.76) MRC, 53.2(9.5) FEV<sub>1</sub>%</li> <li>• Age (range): 61 (8) years</li> </ul> |

|               |                                                                                                                                                                                                                                                                                                                                                                                                                                                                                                                                                                                                                                                                                                                                                                                                                                                                                                                                                                                                                             |
|---------------|-----------------------------------------------------------------------------------------------------------------------------------------------------------------------------------------------------------------------------------------------------------------------------------------------------------------------------------------------------------------------------------------------------------------------------------------------------------------------------------------------------------------------------------------------------------------------------------------------------------------------------------------------------------------------------------------------------------------------------------------------------------------------------------------------------------------------------------------------------------------------------------------------------------------------------------------------------------------------------------------------------------------------------|
|               | <p>Intervention 2</p> <ul style="list-style-type: none"> <li>• <i>COPD severity (GOLD/MRC score):</i> 2.58 (0.69) MRC, 56.4(8.3) FEV<sub>1</sub>%</li> <li>• <i>Age (range):</i> 58 (7) years</li> </ul> <p>Control</p> <ul style="list-style-type: none"> <li>• <i>COPD severity (GOLD/MRC score):</i> 2.53 (0.89) MRC; 54.6(7.1) FEV<sub>1</sub>%</li> <li>• <i>Age (range):</i> 60 (8) years</li> </ul> <p>Included criteria: Patients admitted to chest dis-eases department, Alexandria Main University Hospital witha primary diagnosis of acute exacerbation of COPD.</p> <p>Excluded criteria: Exclusion criteria: 1) Hypoxemic patients at rest or exercise, 2) Comorbidity that could limit exercise training like cardiovascular, musculoskeletal or neuromuscular diseases, 3) Patients who attended a pulmonary rehabilitation program in the preceding year.</p> <p>Pretreatment: No significant differences were found between groups in terms of age, BMI, airflow obstruction, or arterial Blood gases</p> |
| Interventions | <p>Intervention Characteristics</p> <p>Intervention 1</p> <ul style="list-style-type: none"> <li>• <i>Description:</i> Endurance training</li> <li>• <i>Duration (weeks):</i> 8 weeks</li> <li>• <i>Longest follow up (after end of treatment):</i> After end of treatment</li> </ul> <p>Intervention 2</p> <ul style="list-style-type: none"> <li>• <i>Description:</i> Combined training (CT) (endurance + strength training)</li> <li>• <i>Duration (weeks):</i> 8 weeks</li> <li>• <i>Longest follow up (after end of treatment):</i> After end treatment</li> </ul> <p>Control</p> <ul style="list-style-type: none"> <li>• <i>Description:</i> Medical treatment</li> <li>• <i>Duration (weeks):</i> 8 weeks</li> <li>• <i>Longest follow up (after end of treatment):</i> After end of treatment</li> </ul>                                                                                                                                                                                                          |
| Outcomes      | <i>Quality of life, SD</i>                                                                                                                                                                                                                                                                                                                                                                                                                                                                                                                                                                                                                                                                                                                                                                                                                                                                                                                                                                                                  |

|       |                                                                                                                                                                                                                                                                                                                                                                                                                                                                                                                 |
|-------|-----------------------------------------------------------------------------------------------------------------------------------------------------------------------------------------------------------------------------------------------------------------------------------------------------------------------------------------------------------------------------------------------------------------------------------------------------------------------------------------------------------------|
|       | <ul style="list-style-type: none"> <li>• Outcome type: Continuous Outcome</li> </ul> <p><i>6 min Walk test, SD</i></p> <ul style="list-style-type: none"> <li>• Outcome type: Continuous Outcome</li> </ul>                                                                                                                                                                                                                                                                                                     |
| Notes | <p>Country: Egypt<br/> Authors name: Rasha Daabis<br/> Institution: Dept. of Chest Diseases, Faculty of Medicine, Alexandria University, Alexandria, Egypt<br/> Email: rgdaabis@yahoo.com, rgdaabis@gmail.com<br/> Address: Department of Chest Diseases, Faculty of Medicine, Alexandria University, Alazarita, Alkhartoom Square, Egypt</p> <p>Outcomes</p> <ul style="list-style-type: none"> <li>• Quality of life: SGRQ, St. Georges Respiratory Questionnaire</li> <li>• Walk test: 6-min test</li> </ul> |

Risk of bias table:

| Bias                                                                            | Author's judgement | Support for judgement                                                       |
|---------------------------------------------------------------------------------|--------------------|-----------------------------------------------------------------------------|
| Random sequence generation (selection bias)                                     | Unclear risk       | Patients were allocated randomly to groups. It is unknown how this was done |
| Allocation concealment (selection bias)                                         | Unclear risk       | Nothing mentioned                                                           |
| Blinding of participants and personnel (performance bias)<br>Hospital admission | Unclear risk       | Nothing mentioned                                                           |
| Blinding of participants and personnel (performance bias)<br>HRQoL              | Unclear risk       | Nothing mentioned                                                           |
| Blinding of participants                                                        | Unclear risk       | Nothing mentioned                                                           |

|                                                                              |              |                                                                                                        |
|------------------------------------------------------------------------------|--------------|--------------------------------------------------------------------------------------------------------|
| and personnel<br>(performance bias)<br>Mortality                             |              |                                                                                                        |
| Blinding of participants<br>and personnel<br>(performance bias)<br>Walk test | Unclear risk | Nothing mentioned                                                                                      |
| Blinding of outcome<br>assessment<br>(detection bias)                        | Unclear risk | Nothing mentioned                                                                                      |
| Incomplete outcome data<br>(attrition bias)                                  | Unclear risk | 45 patients were enrolled in the study. Only 15 per group was assessed. Nothing mentioned on dropouts. |
| Selective reporting<br>(reporting bias)                                      | Unclear risk | No other apparent source of bias                                                                       |
| Other bias                                                                   | Unclear risk | No other apparent source of bias                                                                       |

#### Deepak 2014

|              |                                                                                                                                                                                                                                                                                                                                                                                                                                                             |
|--------------|-------------------------------------------------------------------------------------------------------------------------------------------------------------------------------------------------------------------------------------------------------------------------------------------------------------------------------------------------------------------------------------------------------------------------------------------------------------|
| Methods      | Study design: Randomized controlled trial<br>Study grouping: Parallel group                                                                                                                                                                                                                                                                                                                                                                                 |
| Participants | <p>Baseline Characteristics</p> <p>Intervention</p> <ul style="list-style-type: none"> <li>• <i>COPD severity (GOLD/MRC score):</i> 53.3±18.4 (mean FEV<sub>1</sub>%)</li> <li>• <i>Male (%):</i> 28 males</li> <li>• <i>Age (range):</i> 58.4 (6.8) age, years</li> </ul> <p>Control</p> <ul style="list-style-type: none"> <li>• <i>COPD severity (GOLD/MRC score):</i> 46.7±14.8 (mean FEV<sub>1</sub>%)</li> <li>• <i>Male (%):</i> 28 males</li> </ul> |

|               |                                                                                                                                                                                                                                                                                                                                                                                                                                                                                                                                                                                                                                                                                                                                                                                                                                                       |
|---------------|-------------------------------------------------------------------------------------------------------------------------------------------------------------------------------------------------------------------------------------------------------------------------------------------------------------------------------------------------------------------------------------------------------------------------------------------------------------------------------------------------------------------------------------------------------------------------------------------------------------------------------------------------------------------------------------------------------------------------------------------------------------------------------------------------------------------------------------------------------|
|               | <ul style="list-style-type: none"> <li>• <i>Age (range): 59.4 (6.7) age, years</i></li> </ul> <p>Included criteria: Consecutive patients who were admitted with an AECOPD and were discharged from the hospital Who fulfilled the study criteria were included in the study. Unknown what the inclusion criteria were</p> <p>Excluded criteria: Severely ill patients who were unable to walk, or patients with unstable cardiovascular disease (unstable angina or recent acute myocardial infarction), had cognitive impairment, disabling arthritis, and Severe neurological disease was excluded from the study</p> <p>Pretreatment: The mean FEV<sub>1</sub>% in the case and control group was 53.3±18.4 and 46.7±14.8, respectively. The mMRC Breathlessness Scale in the two groups during the initial assessment was found to be similar</p> |
| Interventions | <p>Intervention Characteristics</p> <p>Intervention</p> <ul style="list-style-type: none"> <li>• <i>Description: Standard treatment plus 12-week post-exacerbation pulmonary rehabilitation programme</i></li> <li>• <i>Duration (weeks): 12 weeks</i></li> <li>• <i>Longest follow up (after end of treatment): After end of treatment</i></li> </ul> <p>Control</p> <ul style="list-style-type: none"> <li>• <i>Description: Conventional treatment without pulmonary rehabilitation</i></li> <li>• <i>Duration (weeks): 12 weeks</i></li> <li>• <i>Longest follow up (after end of treatment): After end of treatment</i></li> </ul>                                                                                                                                                                                                               |
| Outcomes      | <p><i>Quality of life, SD</i></p> <ul style="list-style-type: none"> <li>• Outcome type: Continuous outcome</li> </ul> <p><i>Walk test, SD</i></p> <ul style="list-style-type: none"> <li>• Outcome type: Continuous outcome</li> </ul>                                                                                                                                                                                                                                                                                                                                                                                                                                                                                                                                                                                                               |
| Notes         | <p>Country: India</p> <p>Setting: in the department of Pulmonary Medicine at Government Medical College Hospital, Chandigarh</p> <p>Authors name: Deepak TH</p> <p>Institution: Department of Pulmonary Medicine, Government Medical College and Hospital</p> <p>Email: prmohapatra@hotmail.com</p> <p>Address: Department of Pulmonary Medicine, All India Institute of Medical Sciences, Bhubaneswar-751 019 (Odisha),</p>                                                                                                                                                                                                                                                                                                                                                                                                                          |

|  |        |
|--|--------|
|  | India. |
|--|--------|

Risk of bias table:

| Bias                                                                            | Author's judgement | Support for judgement                                                                                                         |
|---------------------------------------------------------------------------------|--------------------|-------------------------------------------------------------------------------------------------------------------------------|
| Random sequence generation (selection bias)                                     | Low risk           | Randomisation was done by block randomisation technique.                                                                      |
| Allocation concealment (selection bias)                                         | Unclear risk       | Nothing mentioned                                                                                                             |
| Blinding of participants and personnel (performance bias)<br>Hospital admission | Unclear risk       | Nothing mentioned                                                                                                             |
| Blinding of participants and personnel (performance bias)<br>HRQoL              | Unclear risk       | Nothing mentioned                                                                                                             |
| Blinding of participants and personnel (performance bias)<br>Mortality          | Unclear risk       | Nothing mentioned                                                                                                             |
| Blinding of participants and personnel (performance bias)<br>Walk test          | Unclear risk       | Nothing mentioned                                                                                                             |
| Blinding of outcome assessment (detection bias)                                 | Unclear risk       | Nothing mentioned                                                                                                             |
| Incomplete outcome data (attrition bias)                                        | Unclear risk       | There were 60 patients enrolled, yet only 28 participants were included in the analysis. There is nothing stated on dropouts. |
| Selective reporting                                                             | Unclear risk       | No other apparent source of bias                                                                                              |

|                  |              |                                        |
|------------------|--------------|----------------------------------------|
| (reporting bias) |              |                                        |
| Other bias       | Unclear risk | The inclusion criteria are not stated. |

### Eaton 2009

|               |                                                                                                                                                                                                                                                                                                                                                                                                                                                                                                                                                                                                                                                                                                                                                                                                                                                                                                                                                                                                                                                                                                                                                         |
|---------------|---------------------------------------------------------------------------------------------------------------------------------------------------------------------------------------------------------------------------------------------------------------------------------------------------------------------------------------------------------------------------------------------------------------------------------------------------------------------------------------------------------------------------------------------------------------------------------------------------------------------------------------------------------------------------------------------------------------------------------------------------------------------------------------------------------------------------------------------------------------------------------------------------------------------------------------------------------------------------------------------------------------------------------------------------------------------------------------------------------------------------------------------------------|
| Methods       | RCT                                                                                                                                                                                                                                                                                                                                                                                                                                                                                                                                                                                                                                                                                                                                                                                                                                                                                                                                                                                                                                                                                                                                                     |
| Participants  | N = 97, Rehabilitation: N = 47, control: N = 50                                                                                                                                                                                                                                                                                                                                                                                                                                                                                                                                                                                                                                                                                                                                                                                                                                                                                                                                                                                                                                                                                                         |
| Interventions | <p>Rehabilitation: The patient started inpatient program as soon as medically appropriate as determined by the attending medical team. Inpatient program: Supervised walking and upper-lower limb strengthening exercise at least 30min/day until discharge, followed by outpatient program: supervised exercise for 8 weeks (1 h session, twice weekly) and patient education (coping with dyspnea, the importance of a regular daily home exercise program, management of activities of daily living, drugs, vaccines, airway clearance techniques, nutritional advice, self-management and action plans for exacerbations, stress and panic management, relaxation techniques, mood disturbance, adapting to a chronic illness and end-of-life care). Only 19 (40%) patients assigned to early rehabilitation satisfied the a priori definition of adherence (attendance at 75% of rehabilitation sessions)<br/>Follow-up: 12 weeks</p> <p>Usual care: Standardized care in accordance with the ATS/ERS COPD guidelines and standardized advice on exercise and maintaining daily activities, but not further specified.<br/>Follow-up: 12 weeks</p> |
| Outcomes      | BMI, airflow obstruction, breathlessness, walking test (6MWT), HRQoL, readmissions, days in hospital                                                                                                                                                                                                                                                                                                                                                                                                                                                                                                                                                                                                                                                                                                                                                                                                                                                                                                                                                                                                                                                    |
| Notes         | Follow-up: 3 months from baseline                                                                                                                                                                                                                                                                                                                                                                                                                                                                                                                                                                                                                                                                                                                                                                                                                                                                                                                                                                                                                                                                                                                       |

### Risk of bias table:

| Bias                                        | Author's judgement | Support for judgement                                                                                                                                                                                           |
|---------------------------------------------|--------------------|-----------------------------------------------------------------------------------------------------------------------------------------------------------------------------------------------------------------|
| Random sequence generation (selection bias) | Low risk           | See Giacomini, M., D. DeJean, and D. Simeonov. "PULMONARY REHABILITATION FOR PATIENTS WITH CHRONIC PULMONARY DISEASE (COPD): AN EVIDENCE BASED ANALYSIS." <i>Ont Health Technol Assess Ser</i> 12 (2012): 1-47. |
| Allocation concealment (selection bias)     | Unclear risk       | See Giacomini, M., D. DeJean, and D. Simeonov. "PULMONARY REHABILITATION FOR PATIENTS WITH CHRONIC PULMONARY DISEASE (COPD): AN EVIDENCE BASED                                                                  |

|                                                                                 |              |                                                                                                                                                                                                                 |
|---------------------------------------------------------------------------------|--------------|-----------------------------------------------------------------------------------------------------------------------------------------------------------------------------------------------------------------|
|                                                                                 |              | ANALYSIS." <i>Ont Health Technol Assess Ser 12</i> (2012): 1-47.                                                                                                                                                |
| Blinding of participants and personnel (performance bias)<br>Hospital admission | High risk    | See Giacomini, M., D. DeJean, and D. Simeonov. "PULMONARY REHABILITATION FOR PATIENTS WITH CHRONIC PULMONARY DISEASE (COPD): AN EVIDENCE BASED ANALYSIS." <i>Ont Health Technol Assess Ser 12</i> (2012): 1-47. |
| Blinding of participants and personnel (performance bias)<br>HRQoL              | High risk    | See Giacomini, M., D. DeJean, and D. Simeonov. "PULMONARY REHABILITATION FOR PATIENTS WITH CHRONIC PULMONARY DISEASE (COPD): AN EVIDENCE BASED ANALYSIS." <i>Ont Health Technol Assess Ser 12</i> (2012): 1-47. |
| Blinding of participants and personnel (performance bias)<br>Mortality          | Low risk     | See Giacomini, M., D. DeJean, and D. Simeonov. "PULMONARY REHABILITATION FOR PATIENTS WITH CHRONIC PULMONARY DISEASE (COPD): AN EVIDENCE BASED ANALYSIS." <i>Ont Health Technol Assess Ser 12</i> (2012): 1-47. |
| Blinding of participants and personnel (performance bias)<br>Walk test          | High risk    | See Giacomini, M., D. DeJean, and D. Simeonov. "PULMONARY REHABILITATION FOR PATIENTS WITH CHRONIC PULMONARY DISEASE (COPD): AN EVIDENCE BASED ANALYSIS." <i>Ont Health Technol Assess Ser 12</i> (2012): 1-47. |
| Blinding of outcome assessment (detection bias)                                 | High risk    | See Giacomini, M., D. DeJean, and D. Simeonov. "PULMONARY REHABILITATION FOR PATIENTS WITH CHRONIC PULMONARY DISEASE (COPD): AN EVIDENCE BASED ANALYSIS." <i>Ont Health Technol Assess Ser 12</i> (2012): 1-47. |
| Incomplete outcome data (attrition bias)                                        | Low risk     | See Giacomini, M., D. DeJean, and D. Simeonov. "PULMONARY REHABILITATION FOR PATIENTS WITH CHRONIC PULMONARY DISEASE (COPD): AN EVIDENCE BASED ANALYSIS." <i>Ont Health Technol Assess Ser 12</i> (2012): 1-47. |
| Selective reporting (reporting bias)                                            | Low risk     | See Giacomini, M., D. DeJean, and D. Simeonov. "PULMONARY REHABILITATION FOR PATIENTS WITH CHRONIC PULMONARY DISEASE (COPD): AN EVIDENCE BASED ANALYSIS." <i>Ont Health Technol Assess Ser 12</i> (2012): 1-47. |
| Other bias                                                                      | Unclear risk | See Giacomini, M., D. DeJean, and D. Simeonov. "PULMONARY REHABILITATION FOR PATIENTS WITH CHRONIC PULMONARY DISEASE (COPD): AN EVIDENCE BASED ANALYSIS." <i>Ont Health Technol Assess Ser 12</i> (2012): 1-47. |

**Ko 2011**

|               |                                                                                                                    |
|---------------|--------------------------------------------------------------------------------------------------------------------|
| Methods       | RCT                                                                                                                |
| Participants  | N = 60, rehabilitation: N = 30, no rehabilitation: N = 30                                                          |
| Interventions | 8 weeks of rehabilitation, 2-3 times a week, aerobe walking and cycle training                                     |
| Outcomes      | Adverse events, readmissions, breathlessness (mMRC) HRQoL (SGRQ), walking test (6MWT), C-P exercise test (VO2 max) |
| Notes         | 6 months follow-up                                                                                                 |

Risk of bias table:

| Bias                                                                            | Authors' judgements | Support for judgement                           |
|---------------------------------------------------------------------------------|---------------------|-------------------------------------------------|
| Random sequence generation (selection bias)                                     | Low risk            | random number generator                         |
| Allocation concealment (selection bias)                                         | Unclear risk        | Not stated                                      |
| Blinding of participants and personnel (performance bias)<br>Hospital admission | High risk           | Not blinded                                     |
| Blinding of participants and personnel (performance bias)<br>HRQoL              | High risk           | Not blinded                                     |
| Blinding of participants and personnel (performance bias)<br>Mortality          | Unclear risk        | Nothing stated                                  |
| Blinding of participants and personnel (performance bias)<br>Walk test          | High risk           | Not blinded                                     |
| Blinding of outcome assessment (detection bias)                                 | Low risk            | Blinded                                         |
| Incomplete outcome data (attrition bias)                                        | Low risk            | Not detected                                    |
| Selective reporting (reporting bias)                                            | High risk           | Misleading presentation of data on readmissions |
| Other bias                                                                      | Low risk            | Not detected                                    |

**Ko 2017**

|               |                                                                                                                                                                                                                                                                                                                                                                                                                                                                                                                                                                                                                                                                                                                                                                                                                                                                                                                                                                                                                                                        |
|---------------|--------------------------------------------------------------------------------------------------------------------------------------------------------------------------------------------------------------------------------------------------------------------------------------------------------------------------------------------------------------------------------------------------------------------------------------------------------------------------------------------------------------------------------------------------------------------------------------------------------------------------------------------------------------------------------------------------------------------------------------------------------------------------------------------------------------------------------------------------------------------------------------------------------------------------------------------------------------------------------------------------------------------------------------------------------|
| Methods       | <p>Study design: Randomized controlled trial<br/>         Study grouping: Parallel group</p>                                                                                                                                                                                                                                                                                                                                                                                                                                                                                                                                                                                                                                                                                                                                                                                                                                                                                                                                                           |
| Participants  | <p>Baseline Characteristics</p> <p>Intervention</p> <ul style="list-style-type: none"> <li>• <i>COPD severity (GOLD/MRC score):</i> 46.7 (18.3) FEV1, % of pred.</li> <li>• <i>Male (%):</i> 94.4 %</li> <li>• <i>Age (range):</i> 74.9 (7.9) age, years</li> </ul> <p>Control</p> <ul style="list-style-type: none"> <li>• <i>COPD severity (GOLD/MRC score):</i> 44.2 (14.7) FEV1, % of pred.</li> <li>• <i>Male (%):</i> 96.7 %</li> <li>• <i>Age (range):</i> 74.6 (8.6) age, years</li> </ul> <p>Included criteria: Patients who had been admitted with AECOPD to the Prince of Wales Hospital.</p> <p>Excluded criteria: Exclusion criteria were: age 40 years; a diagnosis of asthma; chronic lung disease other than COPD (e.g. pneumoconiosis, pulmonary fibrosis); very severe medical illness that would affect the patient's ability to participate in this study (e.g. terminal malignancy); and unable to give informed consent.</p> <p>Pretreatment: There was no difference in the demographic characteristics between the groups.</p> |
| Interventions | <p>Intervention Characteristics</p> <p>Intervention</p> <ul style="list-style-type: none"> <li>• <i>Description:</i> Education and an individualized physical training program to perform at home or a short course of outpatient pulmonary rehabilitation. Phone call from nurse</li> <li>• <i>Duration (weeks):</i> 12 months</li> <li>• <i>Longest follow up (after end of treatment):</i> 12 months after end of treatment</li> </ul> <p>Control</p>                                                                                                                                                                                                                                                                                                                                                                                                                                                                                                                                                                                               |

|          |                                                                                                                                                                                                                                                                                                                                                                                                                                                                                                                                                                                                                                                                                                                                          |
|----------|------------------------------------------------------------------------------------------------------------------------------------------------------------------------------------------------------------------------------------------------------------------------------------------------------------------------------------------------------------------------------------------------------------------------------------------------------------------------------------------------------------------------------------------------------------------------------------------------------------------------------------------------------------------------------------------------------------------------------------------|
|          | <ul style="list-style-type: none"> <li>• <i>Description</i>: Usual care</li> <li>• <i>Duration (weeks)</i>: 12 months</li> <li>• <i>Longest follow up (after end of treatment)</i>: 12 months after end of treatment</li> </ul>                                                                                                                                                                                                                                                                                                                                                                                                                                                                                                          |
| Outcomes | <p><i>Mortality, n</i></p> <ul style="list-style-type: none"> <li>• Outcome type: Dichotomous outcome</li> </ul> <p><i>Quality of life, SD</i></p> <ul style="list-style-type: none"> <li>• Outcome type: Continuous outcome</li> </ul> <p><i>Readmission due to exacerbation, n</i></p> <ul style="list-style-type: none"> <li>• Outcome type: Dichotomous outcome</li> </ul> <p><i>Walk test, CI</i></p> <ul style="list-style-type: none"> <li>• Outcome type: Continuous outcome</li> </ul> <p><i>Hospitalization, SD, end of treatment</i></p> <ul style="list-style-type: none"> <li>• Outcome type: Continuous outcome</li> <li>• Data value: Endpoint</li> </ul>                                                                 |
| Notes    | <p>Country: Kina</p> <p>Comments: Trial registration: NCT 01108835</p> <p>Authors name: Fanny W S KO</p> <p>Institution: Devision of Respiratory Medicine, Department of Medicine and Therapeutics, The Chinese University of Hong Kong</p> <p>Email: dschui@cuhk.edu.hk</p> <p>Address: Dept. of Medicine and therapeutics, The Chinese University of Hong Kong. Prince of Wales Hospital, 30-32 Ngan Shing Street, Shatin, New territories. Hong Kong</p> <p>Outcomes</p> <p>Walk test: 6-min, change, longest follow-up. Quality of life: SGRQ, change, longest follow-up. Readmission: adjusted relative risk of readmission for COPD 95% CI, end of treatment. Hospitilazation: days, end of treatment. Death: end of treatment</p> |

Risk of bias table:

|      |                     |                       |
|------|---------------------|-----------------------|
| Bias | Authors' judgements | Support for judgement |
|------|---------------------|-----------------------|

|                                                                                 |              |                                                                                                                                                                                                                               |
|---------------------------------------------------------------------------------|--------------|-------------------------------------------------------------------------------------------------------------------------------------------------------------------------------------------------------------------------------|
| Random sequence generation (selection bias)                                     | Low risk     | A random number generator was used to assign patients in the intervention or control group                                                                                                                                    |
| Allocation concealment (selection bias)                                         | Low risk     | A computer program (allocation by minimization) was used to assist the randomization of subjects in equal opportunity in either group                                                                                         |
| Blinding of participants and personnel (performance bias)<br>Hospital admission | Unclear risk | An open study for the patients and therapist, but the research assistant performing lung function, walking tests and questionnaire tests was neither involved in the delivery of patients care nor aware of the randomization |
| Blinding of participants and personnel (performance bias)<br>HRQoL              | Unclear risk | Nothing mentioned                                                                                                                                                                                                             |
| Blinding of participants and personnel (performance bias)<br>Mortality          | Unclear risk | Nothing mentioned                                                                                                                                                                                                             |
| Blinding of participants and personnel (performance bias)<br>Walk test          | Unclear risk | Nothing mentioned                                                                                                                                                                                                             |
| Blinding of outcome assessment (detection bias)                                 | Unclear risk | Nothing mentioned                                                                                                                                                                                                             |
| Incomplete outcome data (attrition bias)                                        | Low risk     | No other apparent sources of bias                                                                                                                                                                                             |
| Selective reporting (reporting bias)                                            | Low risk     | Matches the study protocol                                                                                                                                                                                                    |
| Other bias                                                                      | Low risk     | No other apparent sources of bias                                                                                                                                                                                             |

### Man 2004

|               |                                                                                                                                                                                                                                               |
|---------------|-----------------------------------------------------------------------------------------------------------------------------------------------------------------------------------------------------------------------------------------------|
| Methods       | RCT                                                                                                                                                                                                                                           |
| Participants  | N=42, Rehabilitation: N = 21, Control: N = 21                                                                                                                                                                                                 |
| Interventions | Rehabilitation: Multidisciplinary outpatient pulmonary rehabilitation (within 10 days of discharge) with endurance and strength exercise and patient education for 12 weeks (2 sessions/week). Completion rate of pulmonary rehabilitation of |

|          |                                                                                                              |
|----------|--------------------------------------------------------------------------------------------------------------|
|          | 85.7% (18 out of 21 patients)<br>Usual care: Standard community care with respirologist. Follow-up: 12 weeks |
| Outcomes | Walking test (SWT), HRQoL, readmissions, days in hospital, mortality                                         |
| Notes    | Follow-up: 12 weeks                                                                                          |

Risk of bias table:

| Bias                                                                            | Authors' judgement | Support for judgement                                                                                                                                                                                           |
|---------------------------------------------------------------------------------|--------------------|-----------------------------------------------------------------------------------------------------------------------------------------------------------------------------------------------------------------|
| Random sequence generation (selection bias)                                     | Low risk           | See Giacomini, M., D. DeJean, and D. Simeonov. "PULMONARY REHABILITATION FOR PATIENTS WITH CHRONIC PULMONARY DISEASE (COPD): AN EVIDENCE BASED ANALYSIS." <i>Ont Health Technol Assess Ser 12</i> (2012): 1-47. |
| Allocation concealment (selection bias)                                         | Unclear risk       | See Giacomini, M., D. DeJean, and D. Simeonov. "PULMONARY REHABILITATION FOR PATIENTS WITH CHRONIC PULMONARY DISEASE (COPD): AN EVIDENCE BASED ANALYSIS." <i>Ont Health Technol Assess Ser 12</i> (2012): 1-47. |
| Blinding of participants and personnel (performance bias)<br>Hospital admission | High risk          | See Giacomini, M., D. DeJean, and D. Simeonov. "PULMONARY REHABILITATION FOR PATIENTS WITH CHRONIC PULMONARY DISEASE (COPD): AN EVIDENCE BASED ANALYSIS." <i>Ont Health Technol Assess Ser 12</i> (2012): 1-47. |
| Blinding of participants and personnel (performance bias)<br>HRQoL              | High risk          | See Giacomini, M., D. DeJean, and D. Simeonov. "PULMONARY REHABILITATION FOR PATIENTS WITH CHRONIC PULMONARY DISEASE (COPD): AN EVIDENCE BASED ANALYSIS." <i>Ont Health Technol Assess Ser 12</i> (2012): 1-47. |
| Blinding of participants and personnel (performance bias)<br>Mortality          | Low risk           | See Giacomini, M., D. DeJean, and D. Simeonov. "PULMONARY REHABILITATION FOR PATIENTS WITH CHRONIC PULMONARY DISEASE (COPD): AN EVIDENCE BASED ANALYSIS." <i>Ont Health Technol Assess Ser 12</i> (2012): 1-47. |
| Blinding of participants and personnel (performance bias)<br>Walk test          | High risk          | See Giacomini, M., D. DeJean, and D. Simeonov. "PULMONARY REHABILITATION FOR PATIENTS WITH CHRONIC PULMONARY DISEASE (COPD): AN EVIDENCE BASED ANALYSIS." <i>Ont Health Technol Assess Ser 12</i> (2012): 1-47. |
| Blinding of outcome assessment (detection bias)                                 | High risk          | See Giacomini, M., D. DeJean, and D. Simeonov. "PULMONARY REHABILITATION FOR PATIENTS WITH CHRONIC PULMONARY DISEASE (COPD): AN EVIDENCE BASED ANALYSIS." <i>Ont Health Technol Assess Ser 12</i> (2012): 1-47. |
| Incomplete outcome data (attrition bias)                                        | Low risk           | See Giacomini, M., D. DeJean, and D. Simeonov. "PULMONARY REHABILITATION FOR PATIENTS WITH CHRONIC PULMONARY DISEASE (COPD): AN EVIDENCE BASED                                                                  |

|                                      |          |                                                                                                                                                                                                                 |
|--------------------------------------|----------|-----------------------------------------------------------------------------------------------------------------------------------------------------------------------------------------------------------------|
|                                      |          | ANALYSIS." <i>Ont Health Technol Assess Ser 12</i> (2012): 1-47.                                                                                                                                                |
| Selective reporting (reporting bias) | Low risk | See Giacomini, M., D. DeJean, and D. Simeonov. "PULMONARY REHABILITATION FOR PATIENTS WITH CHRONIC PULMONARY DISEASE (COPD): AN EVIDENCE BASED ANALYSIS." <i>Ont Health Technol Assess Ser 12</i> (2012): 1-47. |
| Other bias                           | Low risk | See Giacomini, M., D. DeJean, and D. Simeonov. "PULMONARY REHABILITATION FOR PATIENTS WITH CHRONIC PULMONARY DISEASE (COPD): AN EVIDENCE BASED ANALYSIS." <i>Ont Health Technol Assess Ser 12</i> (2012): 1-47. |

### Murphy 2005

|               |                                                                                                                                                                                                                                                                                                                                           |
|---------------|-------------------------------------------------------------------------------------------------------------------------------------------------------------------------------------------------------------------------------------------------------------------------------------------------------------------------------------------|
| Methods       | RCT                                                                                                                                                                                                                                                                                                                                       |
| Participants  | N=31, Rehabilitation: N = 16, Control: N = 15                                                                                                                                                                                                                                                                                             |
| Interventions | Rehabilitation: Supervised home-based pulmonary rehabilitation with endurance and strength exercise for 6 weeks (2 supervised sessions/week and daily unsupervised sessions). Completion rate of pulmonary rehabilitation of 76.9% (10 out of 13 patients)<br>Usual care: Standard community care with respirologist. Follow-up: 26 weeks |
| Outcomes      | Walking test (SWT), breathlessness, HRQoL, readmissions, exacerbations                                                                                                                                                                                                                                                                    |
| Notes         | Follow-up: 3 months                                                                                                                                                                                                                                                                                                                       |

### Risk of bias table:

| Bias                                                      | Authors' judgement | Support for judgement                                                                                                                                                                                           |
|-----------------------------------------------------------|--------------------|-----------------------------------------------------------------------------------------------------------------------------------------------------------------------------------------------------------------|
| Random sequence generation (selection bias)               | Unclear risk       | See Giacomini, M., D. DeJean, and D. Simeonov. "PULMONARY REHABILITATION FOR PATIENTS WITH CHRONIC PULMONARY DISEASE (COPD): AN EVIDENCE BASED ANALYSIS." <i>Ont Health Technol Assess Ser 12</i> (2012): 1-47. |
| Allocation concealment (selection bias)                   | Low risk           | See Giacomini, M., D. DeJean, and D. Simeonov. "PULMONARY REHABILITATION FOR PATIENTS WITH CHRONIC PULMONARY DISEASE (COPD): AN EVIDENCE BASED ANALYSIS." <i>Ont Health Technol Assess Ser 12</i> (2012): 1-47. |
| Blinding of participants and personnel (performance bias) | Unclear risk       | See Giacomini, M., D. DeJean, and D. Simeonov. "PULMONARY REHABILITATION FOR PATIENTS WITH CHRONIC PULMONARY DISEASE (COPD): AN EVIDENCE BASED                                                                  |

|                                                                     |              |                                                                                                                                                                                                                 |
|---------------------------------------------------------------------|--------------|-----------------------------------------------------------------------------------------------------------------------------------------------------------------------------------------------------------------|
| Hospital admission                                                  |              | ANALYSIS." <i>Ont Health Technol Assess Ser</i> 12 (2012): 1-47.                                                                                                                                                |
| Blinding of participants and personnel (performance bias) HRQoL     | High risk    | See Giacomini, M., D. DeJean, and D. Simeonov. "PULMONARY REHABILITATION FOR PATIENTS WITH CHRONIC PULMONARY DISEASE (COPD): AN EVIDENCE BASED ANALYSIS." <i>Ont Health Technol Assess Ser</i> 12 (2012): 1-47. |
| Blinding of participants and personnel (performance bias) Mortality | Low risk     | See Giacomini, M., D. DeJean, and D. Simeonov. "PULMONARY REHABILITATION FOR PATIENTS WITH CHRONIC PULMONARY DISEASE (COPD): AN EVIDENCE BASED ANALYSIS." <i>Ont Health Technol Assess Ser</i> 12 (2012): 1-47. |
| Blinding of participants and personnel (performance bias) Walk test | Unclear risk | See Giacomini, M., D. DeJean, and D. Simeonov. "PULMONARY REHABILITATION FOR PATIENTS WITH CHRONIC PULMONARY DISEASE (COPD): AN EVIDENCE BASED ANALYSIS." <i>Ont Health Technol Assess Ser</i> 12 (2012): 1-47. |
| Blinding of outcome assessment (detection bias)                     | Low risk     | See Giacomini, M., D. DeJean, and D. Simeonov. "PULMONARY REHABILITATION FOR PATIENTS WITH CHRONIC PULMONARY DISEASE (COPD): AN EVIDENCE BASED ANALYSIS." <i>Ont Health Technol Assess Ser</i> 12 (2012): 1-47. |
| Incomplete outcome data (attrition bias)                            | Low risk     | See Giacomini, M., D. DeJean, and D. Simeonov. "PULMONARY REHABILITATION FOR PATIENTS WITH CHRONIC PULMONARY DISEASE (COPD): AN EVIDENCE BASED ANALYSIS." <i>Ont Health Technol Assess Ser</i> 12 (2012): 1-47. |
| Selective reporting (reporting bias)                                | Low risk     | See Giacomini, M., D. DeJean, and D. Simeonov. "PULMONARY REHABILITATION FOR PATIENTS WITH CHRONIC PULMONARY DISEASE (COPD): AN EVIDENCE BASED ANALYSIS." <i>Ont Health Technol Assess Ser</i> 12 (2012): 1-47. |
| Other bias                                                          | Unclear risk | See Giacomini, M., D. DeJean, and D. Simeonov. "PULMONARY REHABILITATION FOR PATIENTS WITH CHRONIC PULMONARY DISEASE (COPD): AN EVIDENCE BASED ANALYSIS." <i>Ont Health Technol Assess Ser</i> 12 (2012): 1-47. |

### Puhan 2012

|              |                                                                 |
|--------------|-----------------------------------------------------------------|
| Methods      | RCT                                                             |
| Participants | N=36, early rehabilitation: N = 19, late rehabilitation: N = 17 |

|               |                                                                                                                                          |
|---------------|------------------------------------------------------------------------------------------------------------------------------------------|
| Interventions | 12-week program, in or outpatient rehabilitation center, 24 sessions (range 18-36), including both endurance and strength, and education |
| Outcomes      | Exacerbation rate over 18 months, HRQoL (CRQ), breathlessness (mMRC)                                                                     |
| Notes         |                                                                                                                                          |

Risk of bias table:

| Bias                                                                         | Authors' judgement | Support for judgement                                                                                                                                                   |
|------------------------------------------------------------------------------|--------------------|-------------------------------------------------------------------------------------------------------------------------------------------------------------------------|
| Random sequence generation (selection bias)                                  | Low risk           | See Puhan, Milo A., et al. "Pulmonary rehabilitation following exacerbations of chronic obstructive pulmonary disease." <i>Cochrane Database Syst Rev</i> 10.10 (2011). |
| Allocation concealment (selection bias)                                      | Low risk           | See Puhan, Milo A., et al. "Pulmonary rehabilitation following exacerbations of chronic obstructive pulmonary disease." <i>Cochrane Database Syst Rev</i> 10.10 (2011). |
| Blinding of participants and personnel (performance bias) Hospital admission | High risk          | See Puhan, Milo A., et al. "Pulmonary rehabilitation following exacerbations of chronic obstructive pulmonary disease." <i>Cochrane Database Syst Rev</i> 10.10 (2011). |
| Blinding of participants and personnel (performance bias) HRQoL              | High risk          | See Puhan, Milo A., et al. "Pulmonary rehabilitation following exacerbations of chronic obstructive pulmonary disease." <i>Cochrane Database Syst Rev</i> 10.10 (2011). |
| Blinding of participants and personnel (performance bias) Mortality          | Low risk           | See Puhan, Milo A., et al. "Pulmonary rehabilitation following exacerbations of chronic obstructive pulmonary disease." <i>Cochrane Database Syst Rev</i> 10.10 (2011). |
| Blinding of participants and personnel (performance bias) Walk test          | High risk          | See Puhan, Milo A., et al. "Pulmonary rehabilitation following exacerbations of chronic obstructive pulmonary disease." <i>Cochrane Database Syst Rev</i> 10.10 (2011). |
| Blinding of outcome assessment (detection bias)                              | Unclear risk       | See Puhan, Milo A., et al. "Pulmonary rehabilitation following exacerbations of chronic obstructive pulmonary disease." <i>Cochrane Database Syst Rev</i> 10.10 (2011). |
| Incomplete outcome data (attrition bias)                                     | Low risk           | See Puhan, Milo A., et al. "Pulmonary rehabilitation following exacerbations of chronic obstructive pulmonary disease." <i>Cochrane Database Syst Rev</i> 10.10 (2011). |
| Selective reporting (reporting)                                              | Low risk           | See Puhan, Milo A., et al. "Pulmonary rehabilitation following exacerbations of chronic                                                                                 |

|            |          |                                                                                                                                                                         |
|------------|----------|-------------------------------------------------------------------------------------------------------------------------------------------------------------------------|
| bias)      |          | obstructive pulmonary disease." <i>Cochrane Database Syst Rev</i> 10.10 (2011).                                                                                         |
| Other bias | Low risk | See Puhan, Milo A., et al. "Pulmonary rehabilitation following exacerbations of chronic obstructive pulmonary disease." <i>Cochrane Database Syst Rev</i> 10.10 (2011). |

### Revitt 2018

|               |                                                                                                                                                                                                                                                                                                                                                                                                                                                                                                                                                                                                                                                                                                                                                                                                                                                                                                                                                                                                                                                                                                            |
|---------------|------------------------------------------------------------------------------------------------------------------------------------------------------------------------------------------------------------------------------------------------------------------------------------------------------------------------------------------------------------------------------------------------------------------------------------------------------------------------------------------------------------------------------------------------------------------------------------------------------------------------------------------------------------------------------------------------------------------------------------------------------------------------------------------------------------------------------------------------------------------------------------------------------------------------------------------------------------------------------------------------------------------------------------------------------------------------------------------------------------|
| Methods       | Study design: Randomized controlled trial<br>Study grouping: Parallel group                                                                                                                                                                                                                                                                                                                                                                                                                                                                                                                                                                                                                                                                                                                                                                                                                                                                                                                                                                                                                                |
| Participants  | <p>Baseline Characteristics</p> <p>Intervention</p> <ul style="list-style-type: none"> <li>• <i>COPD severity (GOLD/MRC score)</i>: 51.04 (20.46), FEV1 % of predicted.</li> <li>• <i>Male (%)</i>:</li> <li>• <i>Age (range)</i>: 64.32 (7.37)</li> </ul> <p>Control</p> <ul style="list-style-type: none"> <li>• <i>COPD severity (GOLD/MRC score)</i>: 52.33 (17.53), FEV1 % of predicted</li> <li>• <i>Male (%)</i>:</li> <li>• <i>Age (range)</i>: 65.8 (7.24)</li> </ul> <p>Included criteria: Inclusion criteria were confirmed diagnosis of COPD prior to current admission and an increase in self-reported breathlessness on exertion.</p> <p>Excluded criteria: Exclusion criteria were inability to provide informed consent; acute cardiac event; and the presence of musculoskeletal, neurological and psychiatric co-morbidities that would prevent the delivery of PR.</p> <p>Pretreatment: Both groups were well matched for age, Lung function and exercise capacity. Randomization was not equal across both arms with N = 24 in the early PR group and N = 12 in the D-PEPR group.</p> |
| Interventions | <p>Intervention Characteristics</p> <p>Intervention</p> <ul style="list-style-type: none"> <li>• <i>Description</i>: Occurred within 4 weeks of discharge. PR was delivered twice weekly for 6 weeks, with each session being 2 hours. It consisted of individualized aerobic and resistance exercises and education which covered topics including chest</li> </ul>                                                                                                                                                                                                                                                                                                                                                                                                                                                                                                                                                                                                                                                                                                                                       |

|          |                                                                                                                                                                                                                                                                                                                                                                                                                                                                                                                                                                                                                                                                                                   |
|----------|---------------------------------------------------------------------------------------------------------------------------------------------------------------------------------------------------------------------------------------------------------------------------------------------------------------------------------------------------------------------------------------------------------------------------------------------------------------------------------------------------------------------------------------------------------------------------------------------------------------------------------------------------------------------------------------------------|
|          | <p>clearance and energy conservation.</p> <ul style="list-style-type: none"> <li>• <i>Duration (weeks):</i> 6 weeks</li> <li>• <i>Longest follow up (after end of treatment):</i> End of treatment</li> </ul> <p>Control</p> <ul style="list-style-type: none"> <li>• <i>Description:</i> 7 weeks after a control period. PR was delivered twice weekly for 6 weeks, with each session being 2 hours. It consisted of individualized aerobic and resistance exercises and education which covered topics including chest clearance and energy conservation.</li> <li>• <i>Duration (weeks):</i> 6 weeks</li> <li>• <i>Longest follow up (after end of treatment):</i> End of treatment</li> </ul> |
| Outcomes | <p><i>Dropouts, n</i></p> <ul style="list-style-type: none"> <li>• Outcome type: DichotomousOutcome</li> </ul> <p><i>Shuttle Walk test, end of treatment</i></p> <ul style="list-style-type: none"> <li>• Outcome type: ContinuousOutcome</li> </ul>                                                                                                                                                                                                                                                                                                                                                                                                                                              |
| Notes    |                                                                                                                                                                                                                                                                                                                                                                                                                                                                                                                                                                                                                                                                                                   |

Risk of bias table:

| Bias                                                                            | Authors' judgement | Support for judgement                        |
|---------------------------------------------------------------------------------|--------------------|----------------------------------------------|
| Random sequence generation (selection bias)                                     | Unclear risk       | Nothing mentioned                            |
| Allocation concealment (selection bias)                                         | Low risk           | Judgement Comment: Sealed envelope technique |
| Blinding of participants and personnel (performance bias)<br>Hospital admission | Unclear risk       | Nothing mentioned                            |
| Blinding of participants and personnel (performance bias)<br>HRQoL              | Unclear risk       | Nothing mentioned                            |

|                                                                        |              |                                                                                                                                                                                                                    |
|------------------------------------------------------------------------|--------------|--------------------------------------------------------------------------------------------------------------------------------------------------------------------------------------------------------------------|
| Blinding of participants and personnel (performance bias)<br>Mortality | Unclear risk | Nothing mentioned                                                                                                                                                                                                  |
| Blinding of participants and personnel (performance bias)<br>Walk test | Unclear risk | Nothing mentioned                                                                                                                                                                                                  |
| Blinding of outcome assessment (detection bias)                        | Unclear risk | Judgement Comment: Nothing mentioned                                                                                                                                                                               |
| Incomplete outcome data (attrition bias)                               | Low risk     | Judgement Comment: Dropouts have been accounted for                                                                                                                                                                |
| Selective reporting (reporting bias)                                   | High risk    | Quote: "Health-related quality of life measures were gathered, but on analysis, there were insufficient complete data sets to enable accurate analysis so this has not been reported."                             |
| Other bias                                                             | High risk    | Quote: "As a result of the original sample number not being met in the allocated time and lower than anticipated uptake and retention issues, the trial was terminated prematurely and was deemed a failed trial." |

### Seymour 2010

|               |                                                                                                                                                                                                                                                                                                                                                                                                                                                                                                                                                                                                                                                            |
|---------------|------------------------------------------------------------------------------------------------------------------------------------------------------------------------------------------------------------------------------------------------------------------------------------------------------------------------------------------------------------------------------------------------------------------------------------------------------------------------------------------------------------------------------------------------------------------------------------------------------------------------------------------------------------|
| Methods       | RCT                                                                                                                                                                                                                                                                                                                                                                                                                                                                                                                                                                                                                                                        |
| Participants  | N = 60, Rehabilitation: N = 30, Control: N = 30                                                                                                                                                                                                                                                                                                                                                                                                                                                                                                                                                                                                            |
| Interventions | <p>Rehabilitation: Within a week after hospital discharged, outpatient pulmonary rehabilitation twice-weekly exercise (limb strengthening and aerobic activities) and education sessions, for 8 weeks. Completion rate of pulmonary rehabilitation of 77% (23 out of 30). Patients were provided with general information about COPD and offered outpatient appointments with general practitioner or respiratory team. Follow-up: 12 weeks</p> <p>Usual care: Patients were provided with general information about COPD and offered outpatient appointments with general practitioner or respiratory team. Not referred further. Follow-up: 12 weeks</p> |
| Outcomes      | Readmissions due to exacerbations, muscle strength, walking test (SWT), HRQoL                                                                                                                                                                                                                                                                                                                                                                                                                                                                                                                                                                              |
| Notes         | Follow-up: 3 months after admission                                                                                                                                                                                                                                                                                                                                                                                                                                                                                                                                                                                                                        |

Risk of bias table:

| Bias                                                                         | Authors' judgement | Support for judgement                                                                                                                                                                                           |
|------------------------------------------------------------------------------|--------------------|-----------------------------------------------------------------------------------------------------------------------------------------------------------------------------------------------------------------|
| Random sequence generation (selection bias)                                  | Unclear risk       | See Giacomini, M., D. DeJean, and D. Simeonov. "PULMONARY REHABILITATION FOR PATIENTS WITH CHRONIC PULMONARY DISEASE (COPD): AN EVIDENCE BASED ANALYSIS." <i>Ont Health Technol Assess Ser 12</i> (2012): 1-47. |
| Allocation concealment (selection bias)                                      | Unclear risk       | See Giacomini, M., D. DeJean, and D. Simeonov. "PULMONARY REHABILITATION FOR PATIENTS WITH CHRONIC PULMONARY DISEASE (COPD): AN EVIDENCE BASED ANALYSIS." <i>Ont Health Technol Assess Ser 12</i> (2012): 1-47. |
| Blinding of participants and personnel (performance bias) Hospital admission | High risk          | See Giacomini, M., D. DeJean, and D. Simeonov. "PULMONARY REHABILITATION FOR PATIENTS WITH CHRONIC PULMONARY DISEASE (COPD): AN EVIDENCE BASED ANALYSIS." <i>Ont Health Technol Assess Ser 12</i> (2012): 1-47. |
| Blinding of participants and personnel (performance bias) HRQoL              | High risk          | See Giacomini, M., D. DeJean, and D. Simeonov. "PULMONARY REHABILITATION FOR PATIENTS WITH CHRONIC PULMONARY DISEASE (COPD): AN EVIDENCE BASED ANALYSIS." <i>Ont Health Technol Assess Ser 12</i> (2012): 1-47. |
| Blinding of participants and personnel (performance bias) Mortality          | Low risk           | See Giacomini, M., D. DeJean, and D. Simeonov. "PULMONARY REHABILITATION FOR PATIENTS WITH CHRONIC PULMONARY DISEASE (COPD): AN EVIDENCE BASED ANALYSIS." <i>Ont Health Technol Assess Ser 12</i> (2012): 1-47. |
| Blinding of participants and personnel (performance bias) Walk test          | High risk          | See Giacomini, M., D. DeJean, and D. Simeonov. "PULMONARY REHABILITATION FOR PATIENTS WITH CHRONIC PULMONARY DISEASE (COPD): AN EVIDENCE BASED ANALYSIS." <i>Ont Health Technol Assess Ser 12</i> (2012): 1-47. |
| Blinding of outcome assessment (detection bias)                              | Unclear risk       | See Giacomini, M., D. DeJean, and D. Simeonov. "PULMONARY REHABILITATION FOR PATIENTS WITH CHRONIC PULMONARY DISEASE (COPD): AN EVIDENCE BASED ANALYSIS." <i>Ont Health Technol Assess Ser 12</i> (2012): 1-47. |
| Incomplete outcome data (attrition bias)                                     | Low risk           | See Giacomini, M., D. DeJean, and D. Simeonov. "PULMONARY REHABILITATION FOR PATIENTS WITH CHRONIC PULMONARY DISEASE (COPD): AN EVIDENCE BASED ANALYSIS." <i>Ont Health Technol Assess Ser 12</i> (2012): 1-47. |
| Selective reporting (reporting bias)                                         | Low risk           | See Giacomini, M., D. DeJean, and D. Simeonov. "PULMONARY REHABILITATION FOR PATIENTS WITH CHRONIC PULMONARY DISEASE (COPD): AN EVIDENCE BASED ANALYSIS." <i>Ont Health Technol Assess Ser 12</i> (2012): 1-47. |
| Other bias                                                                   | Unclear risk       | See Giacomini, M., D. DeJean, and D. Simeonov. "PULMONARY REHABILITATION FOR                                                                                                                                    |

|  |  |                                                                                                                                    |
|--|--|------------------------------------------------------------------------------------------------------------------------------------|
|  |  | PATIENTS WITH CHRONIC PULMONARY DISEASE (COPD): AN EVIDENCE BASED ANALYSIS." <i>Ont Health Technol Assess Ser</i> 12 (2012): 1-47. |
|--|--|------------------------------------------------------------------------------------------------------------------------------------|

### Troosters 2000

|               |                                                                                                                                                                                                                                                                                                                                              |
|---------------|----------------------------------------------------------------------------------------------------------------------------------------------------------------------------------------------------------------------------------------------------------------------------------------------------------------------------------------------|
| Methods       | RCT                                                                                                                                                                                                                                                                                                                                          |
| Participants  | 43 COPD patients (mean age 62 years, 85% males, FEV1=39% predicted) after inpatient treatment for acute exacerbation                                                                                                                                                                                                                         |
| Interventions | Rehabilitation: Outpatient pulmonary rehabilitation with endurance and strength exercise for 6 months (3 sessions/week in first 3 months, then 2/week). Completion rate of pulmonary rehabilitation of 70.8% (17 out of 24 patients)<br>Usual care: Standard community care with respirologist (not further specified). Follow-up: 208 weeks |
| Outcomes      | 6MWD, mortality                                                                                                                                                                                                                                                                                                                              |
| Notes         |                                                                                                                                                                                                                                                                                                                                              |

### Risk of bias table:

| Bias                                                                         | Authors' judgement | Support for judgement                                                                                                                                                   |
|------------------------------------------------------------------------------|--------------------|-------------------------------------------------------------------------------------------------------------------------------------------------------------------------|
| Random sequence generation (selection bias)                                  | Unclear risk       | See Puhan, Milo A., et al. "Pulmonary rehabilitation following exacerbations of chronic obstructive pulmonary disease." <i>Cochrane Database Syst Rev</i> 10.10 (2011). |
| Allocation concealment (selection bias)                                      | Unclear risk       | See Puhan, Milo A., et al. "Pulmonary rehabilitation following exacerbations of chronic obstructive pulmonary disease." <i>Cochrane Database Syst Rev</i> 10.10 (2011). |
| Blinding of participants and personnel (performance bias) Hospital admission | Unclear risk       | See Puhan, Milo A., et al. "Pulmonary rehabilitation following exacerbations of chronic obstructive pulmonary disease." <i>Cochrane Database Syst Rev</i> 10.10 (2011). |
| Blinding of participants and personnel (performance bias) HRQoL              | High risk          | See Puhan, Milo A., et al. "Pulmonary rehabilitation following exacerbations of chronic obstructive pulmonary disease." <i>Cochrane Database Syst Rev</i> 10.10 (2011). |
| Blinding of participants and personnel (performance bias) Mortality          | Low risk           | See Puhan, Milo A., et al. "Pulmonary rehabilitation following exacerbations of chronic obstructive pulmonary disease." <i>Cochrane Database Syst Rev</i> 10.10 (2011). |
| Blinding of participants and                                                 | Unclear risk       | See Puhan, Milo A., et al. "Pulmonary rehabilitation following exacerbations of chronic                                                                                 |

|                                                 |              |                                                                                                                                                                         |
|-------------------------------------------------|--------------|-------------------------------------------------------------------------------------------------------------------------------------------------------------------------|
| personnel (performance bias) Walk test          |              | obstructive pulmonary disease." <i>Cochrane Database Syst Rev</i> 10.10 (2011).                                                                                         |
| Blinding of outcome assessment (detection bias) | Unclear risk | See Puhan, Milo A., et al. "Pulmonary rehabilitation following exacerbations of chronic obstructive pulmonary disease." <i>Cochrane Database Syst Rev</i> 10.10 (2011). |
| Incomplete outcome data (attrition bias)        | Low risk     | See Puhan, Milo A., et al. "Pulmonary rehabilitation following exacerbations of chronic obstructive pulmonary disease." <i>Cochrane Database Syst Rev</i> 10.10 (2011). |
| Selective reporting (reporting bias)            | Low risk     | See Puhan, Milo A., et al. "Pulmonary rehabilitation following exacerbations of chronic obstructive pulmonary disease." <i>Cochrane Database Syst Rev</i> 10.10 (2011). |
| Other bias                                      | Low risk     | See Puhan, Milo A., et al. "Pulmonary rehabilitation following exacerbations of chronic obstructive pulmonary disease." <i>Cochrane Database Syst Rev</i> 10.10 (2011). |
