# Supplementary material for: Lower mortality after early supervised pulmonary rehabilitation following COPD-exacerbations: a systematic review and meta-analysis
Source: PubMed Central journal article supplement (PMC6139159; doi:10.1186/s12890-018-0718-1), 2018-09-15
Supplement: 12890_2018_718_MOESM5_ESM.pdf [file 12890_2018_718_MOESM5_ESM.pdf]

**Additional file 5.**

We followed the statements and guidelines from BTS [26], ERS/ATS [10], and as described in Puhan *et al.* [14]. We did not upgrade or downgrade the extent of the PR program if the program was in line with the statements and guidelines. However, we upgraded or downgraded, respectively, the extent of the programs if some components were less or exceeded what these guidelines recommends. We considered PR programs to be extensive if: participant followed, on average, at least 16 exercise sessions, calculated as the total number of possible exercise session times the attendance rate, as recommended by ERS/ATS; the PR program included 2 to 3 exercise sessions per week, as recommended by BTS and ERS/ATS; exercise training included at least endurance exercise ( $\pm$  strength exercise), as recommended by BTS and ERS/ATS; or exercise sessions were supervised, as recommended by BTS and ERS/ATS.

Similar to Puhan *et al.* [14], we used the GRADE approach and downgraded the extent of PR program for the following reasons: if the total number of training sessions was between 10 and 15 (by -1) and less than 10 sessions (by -2); fewer than 2 sessions per weeks (by -1); if exercise training only included strength training or less than 20 min of endurance training per sessions etc. (by -1). The extent of PR was upgraded if: the number of sessions was greater than 30 (by +1) or PR included an extensive self-management program (by +1).

**Table 1. Extensiveness of PR programs in included studies.**

| Study        | Number of sessions   | Sessions per week | PR program      | Supervision of training | Extent of PR |
|--------------|----------------------|-------------------|-----------------|-------------------------|--------------|
| Behnke 2000  | +1 <sup>a</sup>      | -                 | -               | -1 <sup>b</sup>         | Extensive    |
| Daabis 2017  | -                    | -                 | -               | -                       | Extensive    |
| Deepak 2014  | Unclear <sup>c</sup> | Unclear           | -               | -                       | Unclear      |
| Eaton 2009   | -1 <sup>d</sup>      | -                 | +1 <sup>e</sup> | -                       | Extensive    |
| Kirsten 1998 | -                    | -                 | -               | -                       | Extensive    |
| Ko 2011      | -                    | -                 | -               | -                       | Extensive    |
| Ko 2017      | -                    | -                 | +1 <sup>e</sup> | -1 <sup>b</sup>         | Extensive    |

|                |                 |   |                 |   |                    |
|----------------|-----------------|---|-----------------|---|--------------------|
| Man 2004       | -1 <sup>d</sup> | - | +1 <sup>e</sup> | - | Extensive          |
| Murphy 2005    | -1 <sup>d</sup> | - | -               | - | Moderate extensive |
| Puhan 2012     | -               | - | +1 <sup>e</sup> | - | Extensive          |
| Revitt 2018    | -2 <sup>f</sup> | - | -               | - | Slightly extensive |
| Seymour 2010   | -1 <sup>d</sup> | - | +1 <sup>e</sup> | - | Extensive          |
| Troosters 2000 | +1 <sup>a</sup> | - | -               | - | Extensive          |

<sup>a</sup>>30 exercise training sessions.

<sup>b</sup>Some training sessions were unsupervised (home-based training period).

<sup>c</sup>A 12-week exercise intervention, but unclear number of sessions.

<sup>d</sup>10 to 15 training sessions.

<sup>e</sup>Comprehensive self-management education.

<sup>f</sup><10 exercise training sessions.
